# Supplementary material for: Perioperative patient-controlled regional analgesia versus patient-controlled intravenous analgesia for patients with critical limb ischaemia: a study protocol for a randomised controlled trial
Source: PubMed Central journal article supplement — BMJ Open. 2020 Oct 8;10(10):e037879. doi: 10.1136/bmjopen-2020-037879 (PMC7545635; doi:10.1136/bmjopen-2020-037879), 2020-10-08
Supplement: bmjopen-2020-037879.draft_revisions.pdf [file bmjopen-2020-037879.draft_revisions.pdf]

# BMJ Open

BMJ Open is committed to open peer review. As part of this commitment we make the peer review history of every article we publish publicly available.

When an article is published we post the peer reviewers' comments and the authors' responses online. We also post the versions of the paper that were used during peer review. These are the versions that the peer review comments apply to.

The versions of the paper that follow are the versions that were submitted during the peer review process. They are not the versions of record or the final published versions. They should not be cited or distributed as the published version of this manuscript.

BMJ Open is an open access journal and the full, final, typeset and author-corrected version of record of the manuscript is available on our site with no access controls, subscription charges or pay-per-view fees (<http://bmjopen.bmj.com>).

If you have any questions on BMJ Open's open peer review process please email [info.bmjopen@bmj.com](mailto:info.bmjopen@bmj.com)

# BMJ Open

## Perioperative Patient-Controlled Regional Analgesia versus Patient-Controlled Intravenous Analgesia for Patients with Critical Limb Ischemia: A Study Protocol for a Randomized Controlled Trial

|                               |                                                                                                                                                                                                                                                                                                                                                                           |
|-------------------------------|---------------------------------------------------------------------------------------------------------------------------------------------------------------------------------------------------------------------------------------------------------------------------------------------------------------------------------------------------------------------------|
| Journal:                      | <i>BMJ Open</i>                                                                                                                                                                                                                                                                                                                                                           |
| Manuscript ID                 | bmjopen-2020-037879                                                                                                                                                                                                                                                                                                                                                       |
| Article Type:                 | Protocol                                                                                                                                                                                                                                                                                                                                                                  |
| Date Submitted by the Author: | 19-Feb-2020                                                                                                                                                                                                                                                                                                                                                               |
| Complete List of Authors:     | Chen, Si; Peking Union Medical College Hospital, Department of Anesthesiology<br>Xu, Zhonghuang; Peking Union Medical College Hospital, Department of Anesthesiology<br>Liu, Hongju<br>Zhang, Yuelun; Peking Union Medical College Hospital,<br>Zhang, Jiao<br>Chen, Yuexin<br>Zheng, Yuehong ; Peking Union Medical College Hospital, Vascular surgery<br>Huang, Yuguang |
| Keywords:                     | Vascular surgery < SURGERY, PAIN MANAGEMENT, Pain management < ANAESTHETICS                                                                                                                                                                                                                                                                                               |
|                               |                                                                                                                                                                                                                                                                                                                                                                           |

SCHOLARONE™  
Manuscripts

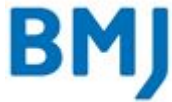

I, the Submitting Author has the right to grant and does grant on behalf of all authors of the Work (as defined in the below author licence), an exclusive licence and/or a non-exclusive licence for contributions from authors who are: i) UK Crown employees; ii) where BMJ has agreed a CC-BY licence shall apply, and/or iii) in accordance with the terms applicable for US Federal Government officers or employees acting as part of their official duties; on a worldwide, perpetual, irrevocable, royalty-free basis to BMJ Publishing Group Ltd ("BMJ") its licensees and where the relevant Journal is co-owned by BMJ to the co-owners of the Journal, to publish the Work in this journal and any other BMJ products and to exploit all rights, as set out in our [licence](#).

The Submitting Author accepts and understands that any supply made under these terms is made by BMJ to the Submitting Author unless you are acting as an employee on behalf of your employer or a postgraduate student of an affiliated institution which is paying any applicable article publishing charge ("APC") for Open Access articles. Where the Submitting Author wishes to make the Work available on an Open Access basis (and intends to pay the relevant APC), the terms of reuse of such Open Access shall be governed by a Creative Commons licence – details of these licences and which [Creative Commons](#) licence will apply to this Work are set out in our licence referred to above.

Other than as permitted in any relevant BMJ Author's Self Archiving Policies, I confirm this Work has not been accepted for publication elsewhere, is not being considered for publication elsewhere and does not duplicate material already published. I confirm all authors consent to publication of this Work and authorise the granting of this licence.

1  
2  
3  
4 Perioperative Patient-Controlled Regional Analgesia versus  
5  
6 Patient-Controlled Intravenous Analgesia for Patients  
7  
8 with Critical Limb Ischemia: A Study Protocol for a  
9  
10  
11  
12 Randomized Controlled Trial  
13  
14  
15  
16

17 Si Chen<sup>1</sup>, Zhonghuang Xu<sup>1</sup>, Hongju Liu<sup>1</sup>, Yuelun Zhang<sup>2</sup>, Jiao Zhang<sup>1</sup>, Yuexin Chen<sup>3</sup>,  
18  
19 Yuehong Zheng<sup>3\*</sup>, Yuguang Huang<sup>1</sup>  
20  
21  
22  
23  
24

25 \*Correspondence: yuehongzheng@yahoo.com  
26

27 Si Chen And Zhonghuang Xu are joint first authors.  
28  
29

30 1Department of Anesthesiology, Peking Union Medical College Hospital, Chinese Academy of  
31  
32 Medical Science & Peking Union Medical College, Beijing, 100730, China.  
33

34  
35 2 Department of Medical Research Center, Peking Union Medical College Hospital, Chinese  
36  
37 Academy of Medical Science & Peking Union Medical College, Beijing, 100730, China.  
38  
39

40 3Department of Vascular surgery, Peking Union Medical College Hospital, Chinese Academy of  
41  
42 Medical Science & Peking Union Medical College, Beijing, 100730, China.  
43  
44  
45  
46  
47

48 Word count: 3158, excluding title page, abstract, references and figures.  
49  
50  
51  
52  
53  
54  
55  
56  
57  
58  
59  
60

**Abstract:**

Introduction: Both regional analgesia and intravenous analgesia are frequently used perioperatively for patients with critical limb ischemia (CLI). Nevertheless, the comparison of perioperative effect of regional and intravenous analgesia has not yet been thoroughly illustrated. This study will comprehensively compare patient-controlled regional analgesia (PCRA) and patient-controlled intravenous analgesia (PCIA) as two different perioperative analgesia approaches for patients with CLI. It investigates their effects on analgesia, reperfusion and the quality of recovery perioperatively, also aims to provide clinical evidence to those non-surgical patients with non-reconstructable arteries.

Methods: This trial is a randomized, single-center, open-label, parallel trial with target sample size of 78 in total. Eligible participants will be randomly allocated to the PCRA group (group R) or the PCIA group (group I) after admission. Participants in group R will receive ultrasound-guided subgluteal sciatic catheterization, followed by continuous patient-controlled regional analgesia infusion (0.2% ropivacaine 15ml as loading dose, 8ml/h as background with a patient-controlled bolus of 6ml). Participants in group I will receive patient-controlled intravenous analgesia (morphine is given in boluses of 1mg as needed, background infusion at 1mg/h). Data will be collected at baseline (T0), two hours before revascularization treatment (T1) and two hours before discharge (T2). The primary outcomes include the numerical rating scale (NRS) pain score at T1 and T2. The secondary outcomes include the perioperative transcutaneous oxygen pressure (TcPO<sub>2</sub>), the tissue hemoglobin index (TOI), Hospital Anxiety and

1  
2  
3  
4 Depression Scale (HADS) at T1 and T2; the Patient Global Impression of Change  
5  
6 (PGIC) at T1 and T2; the perioperative cumulative morphine consumption, the length  
7  
8 of postoperative hospital stay and adverse events (AEs).  
9

10  
11 Ethics and dissemination: This study received authorization from the Institutional  
12  
13 Review Board of Peking Union Medical College Hospital on 21 March 2017 (approval  
14  
15 no. ZS-1289X). Study findings will be disseminated through presentations at scientific  
16  
17 conferences or publications in peer-reviewed journals.  
18  
19  
20

21  
22  
23  
24  
25 Trial registration: Registered on 22 January 2020. Chinese Clinical Trial Registry,  
26  
27 identifier ChiCTR2000029298.  
28

29  
30 Protocol version: V4CP.B1 (18, February, 2020)  
31

32  
33  
34  
35 Strengths and limitations of this study:  
36

- 37 ● Aiming to compare the perioperative efficacy of two different analgesia  
38 approaches, this study will assess their effects on analgesia, reperfusion, as well as  
39 the quality of recovery, rather than their effects on analgesia alone.  
40  
41  
42  
43  
44
- 45 ● Patient-controlled analgesia is used in this study so that the perioperative pain  
46 management for patients with CLI could be individual and continuous. The  
47 analgesia approaches cover the perioperative period thoroughly.  
48  
49  
50  
51
- 52 ● Two different-principle-based measuring parameters are used to evaluate the  
53 reperfusion effect. TcPO<sub>2</sub> is by heating skin to a stable hyperemia equilibrium  
54 condition, TOI is by detecting the absorption and reflection of near-infrared light.  
55  
56  
57  
58  
59  
60

- 1  
2  
3  
4 ● As an open-labeled trial, all participants and some of the investigators are aware of  
5  
6 group assignment, their expectation may introduce bias.  
7  
8  
9  
10  
11

12 **Keywords:** critical limb ischemia, patient-controlled analgesia, perfusion, analgesia  
13  
14  
15  
16  
17  
18  
19  
20  
21  
22  
23  
24  
25  
26  
27  
28  
29  
30  
31  
32  
33  
34  
35  
36  
37  
38  
39  
40  
41  
42  
43  
44  
45  
46  
47  
48  
49  
50  
51  
52  
53  
54  
55  
56  
57  
58  
59  
60

## Introduction

Critical limb ischemia (CLI) presents the end stage of peripheral arterial disease (PAD)

<sup>1</sup>. CLI is clinically defined as ischemic rest pain, ulcers and gangrene in the presence of hemodynamic evidence of arterial insufficiency<sup>2</sup>. The mean annual incidence of CLI was 0.35% reported in a national investigation from the United States<sup>3</sup>. The prevalence is approximately 1% of the adult population, and up to 10% of patients with PAD may have CLI. In recent years, a consensus from Peripheral Academic Research Consortium has provided an objective hemodynamic definition for CLI<sup>4</sup>. In this study, this consensus definition will also be used to diagnose CLI.

The major goal of CLI treatment is to relieve ischemic pain, improve limb perfusion, heal wounds and prevent further tissue loss<sup>5</sup>. The Inter-Society Consensus for the Management of Peripheral Arterial Disease (TASC II) emphasized the importance of the pain management for CLI patients and recommended a multidisciplinary approach to control pain<sup>1</sup>. Pain control is important not only to improve quality of life, but also reduce the possibility of phantom limb pain<sup>6-7</sup>. For patients with PAD, the general principles of perioperative pain management should be individual, continuous and cover the whole perioperative period thoroughly<sup>8</sup>. Over the past years, the patient-controlled analgesia has become the mainstay for providing postoperative pain relief<sup>9</sup>. Accordingly, we considered to establish patient-controlled analgesia preoperatively in our study. Existing studies suggested that intravenous morphine<sup>10</sup> and ultrasound-guided peripheral nerve block provided satisfactory analgesia effect on patients with CLI<sup>11-14</sup>. However, the analgesia effect of intravenous morphine and ultrasound-guided



1  
2  
3  
4 regional block has not been compared before. Therefore, in this study, we plan to  
5  
6 compare the perioperative analgesia effect of patient-controlled regional analgesia  
7  
8 (PCRA) and patient-controlled intravenous analgesia (PCIA) for patients diagnosed  
9  
10 with CLI.  
11  
12

13  
14 Additionally, few of the previous studies have studied the effects on reperfusion besides  
15  
16 analgesia. A previous prospective study showed that continuous peridural ropivacaine  
17  
18 infusion provided satisfactory analgesia, dilated vessels, reconstructed collateral  
19  
20 circulation and improved reperfusion remarkably in diabetic patients<sup>15</sup>. Regional  
21  
22 analgesia can cause changes in vascular blood flow, but data regards to CLI patients'  
23  
24 perioperative experiences is limited. Therefore, in this study, the reperfusion effect of  
25  
26 the PCRA and PCIA methods will be further evaluated within participants with CLI.  
27  
28 To compare the effect on reperfusion between the two analgesia approaches, we plan  
29  
30 to use two different-principle-based measuring parameters, namely, the perioperative  
31  
32 transcutaneous oxygen pressure (TcPO<sub>2</sub>) and the tissue hemoglobin index (TOI).  
33  
34 TcPO<sub>2</sub> is a transcutaneous, conventional clinical parameter measured heating a skin  
35  
36 tissue in the range of 37°C to 45°C to reach a stable hyperemia equilibrium condition<sup>16</sup>.  
37  
38 NIRS detects the absorption and reflection of near-infrared light and has the potential  
39  
40 to provide continuous, real-time measurement of both blood volume and cellular  
41  
42 respiration in skin tissue. Other perioperative data regarding the quality of recovery,  
43  
44 such as the patients' emotional state, global impression of change, perioperative  
45  
46 morphine consumption, length of postoperative hospital stay and adverse events (AEs)  
47  
48 will be investigated as well.  
49  
50  
51  
52  
53  
54  
55  
56  
57  
58  
59  
60

1  
2  
3  
4 We also hope this study offers a reference for the non-surgical patients. Although  
5  
6 revascularization has been the most effective treatment for patients with CLI, some  
7  
8 patients' arteries are impossible to revascularize and require other treatments such as  
9  
10 drugs<sup>17</sup>, transcutaneous electrical stimulation<sup>18</sup>, peripheral blood mononuclear cells  
11  
12 therapy<sup>19</sup> or lumbar sympathectomy<sup>20</sup> to relieve pain and/or increase peripheral  
13  
14 perfusion to avoid amputation. For those patients with non-reconstructable arteries,  
15  
16 long-term PCRA may be less invasive and adequate for both analgesia and perfusion.  
17  
18 There are evidences showing that it is safe to discharge patient home with catheter<sup>21</sup>. In  
19  
20 addition, it has been previously reported that continuous sciatic nerve block could be  
21  
22 used at home for long-term pain control<sup>22</sup>. We expect this perioperative study can also  
23  
24 be a future reference for those who lost their opportunity for revascularization, and  
25  
26 whose quality of life may be significantly improved.  
27  
28  
29  
30  
31  
32  
33  
34  
35  
36  
37

### Objective

38  
39  
40 The objectives of this randomized controlled trial are to compare the perioperative  
41  
42 analgesia efficacy between PCRA and PCIA for patients with CLI. The perioperative  
43  
44 effect on peripheral inflow perfusion, emotion, patient global impression of change  
45  
46 (PGIC), morphine consumption, length of postoperative hospital stay and AEs of  
47  
48 PCRA and PCIA will also be evaluated and compared.  
49  
50  
51  
52  
53  
54  
55

### Methods

#### Overall design

1  
2  
3  
4 This trial is a randomized, single-center, open-label, parallel trial, and will be carried  
5  
6 out in Peking Union Medical College Hospital (PUMCH). Institutional research ethics  
7  
8 board approval was obtained from PUMCH Institutional Review Board (No. ZS-1289X,  
9  
10 21 March 2017). An overall flow diagram is provided in Fig.1. The timing of  
11  
12 interventions and data collection is detailed in Fig 2. This protocol was designed in  
13  
14 accordance with the Standard Protocol Items: Recommendations for Interventional  
15  
16 Trials (SPIRIT) guidelines<sup>23</sup>, the checklist can be found in Appendix 1. The trial will  
17  
18 be conducted at PUMCH in accordance with the Good Clinical Practice- International  
19  
20 Conference on Harmonisation (GCP-ICH) guidelines. This trial was registered with the  
21  
22 Chinese Clinical Trial Registry (ChiCTR2000029298).  
23  
24  
25  
26  
27  
28  
29  
30  
31

### 32 Recruitment

33  
34 Recruitment for this study will begin on 6 May 2020. Full written informed consents  
35  
36 will be obtained from each participant by a qualified member of the research team prior  
37  
38 to any trial-related procedures.  
39  
40  
41  
42  
43  
44

### 45 Inclusion criteria

46  
47 Participants who meets the following criteria will be enrolled in this trial:

- 48 ● 18~80 years of age
  - 49 ● Diagnosed with critical limb ischemia<sup>2 4</sup>, admitted in hospital for elective surgery  
50  
51 treatment, either open surgical or endovascular revascularization
  - 52 ● The lesions are mainly unilateral and in the supplied area of sciatic nerve
- 53  
54  
55  
56  
57  
58  
59  
60

- Stage 6 in Rutherford symptom classification system<sup>24</sup>
- American Society of Anesthesiology (ASA) physical status II~III

#### Exclusion criteria

Participants who meets the following criteria will be excluded:

- Are taking opioids before admission
- Have known allergy to the drugs will be used in the study
- Have severe liver or kidney dysfunction
- Have contraindication for the catheterization (e.g. infection at injection site, coagulation disorders, refuse or be unable to cooperate the procedure)
- The dorsum of the affected foot is not intact
- Are unable to understand the scales or to describe to the investigators

#### Dropout criteria

Participants who meets the following criteria will be withdrawn from the study:

- Not willing to continue their participation
- Cannot follow the initial treatment plan due to any reason

#### Randomization, sequence concealment and blinding

All eligible participants will be randomly allocated to either group R or the group I in a ratio of 1:1 using the R software (R Foundation for Statistical Computing). The random allocation sequence will be computer-generated by an independent researcher

1  
2  
3  
4 who has no contact with any participant and will not be involved in the following  
5  
6 research. The participants' respective treatment group (group R or group I) will be  
7  
8 sealed in an opaque envelope and will only be opened after the enrolment of the  
9  
10 participants in the study. An investigator will be responsible for enrolling patients,  
11  
12 obtaining consent form and requesting randomization.  
13  
14  
15

16  
17 This study is an open-label study whereby the participants, the personnel who carry out  
18  
19 the intervention and the outcome assessor cannot be blinded because of the nature of  
20  
21 the intervention. However, the researchers who are responsible for the statistical  
22  
23 analysis will be blinded to the allocation.  
24  
25  
26  
27  
28  
29

### 30 Interventions

31  
32 Analgesia approaches will be established after the baseline assessment (T0). The  
33  
34 FORNIA CPE-101 electronic infusion pump will be used as the continuous patient-  
35  
36 controlled analgesia device.  
37  
38  
39

### 40 The PCRA group (group R)

41  
42 Ultrasound-guided continuous subgluteal sciatic block will be applied on the  
43  
44 participants enrolled in the group R. Patient will be placed partly lateral and partly  
45  
46 prone, with the legs flexed in the hip and knee. Scanning begins in the depression  
47  
48 between the greater trochanter of femur and the ischial tuberosity using the 8-3MHz  
49  
50 curved probe of the ultrasound equipment (X-porte, SONOSITE, USA). The sciatic  
51  
52 nerve can be identified in the cross-sectional view in between of the two bones, below  
53  
54 the gluteus muscle. Then rotate the transducer 90° so that the sciatic nerve is imaged in  
55  
56  
57  
58  
59  
60

1  
2  
3  
4 the longitudinal view. Insert needle in-plane from the cranial to caudal direction and  
5  
6 underneath the fascia to enter the subgluteal space, then advance the needle until the tip  
7  
8 is adjacent to the nerve. After confirming the needle placement by obtaining a motor  
9  
10 response of the calf and foot using the peripheral nerve stimulator, inject 0.2%  
11  
12 ropivacaine 15ml for loading dose, then insert the catheter 5cm beyond the needle tip  
13  
14 in vicinity of the sciatic nerve. Finally, secure the catheter by tunneling and taping. The  
15  
16 infusion strategy includes 0.2% ropivacaine at 8ml/h as background with a patient-  
17  
18 controlled bolus of 6ml, lockout time 30min, 1-h limit 20ml.  
19  
20  
21  
22  
23

24 The PCIA group (group I)

25  
26  
27 For the participants enrolled in the group I, patient-controlled intravenous analgesia  
28  
29 will be connected after intravenous access is established. The infusion strategy is as  
30  
31 follow. Intravenous morphine is given in boluses of 1mg as needed, background  
32  
33 infusion 1mg/h, with a lockout time of 20min. The 1-h limit is 4mg morphine.  
34  
35  
36

37 The intraoperative and postoperative patient management

38  
39  
40 The continuous patient-controlled analgesia will not be suspended during the  
41  
42 revascularization treatment despite the type of anaesthesia method. After the  
43  
44 revascularization, the device will be paused when patient report it is no longer needed,  
45  
46 which usually takes several days. The device will be on standby for an additional 48  
47  
48 hours before removal. In case of inadequate analgesia is provided perioperatively, the  
49  
50 infusion strategy dosage may be increased for patients in group I, extra-doses of  
51  
52 intravenous morphine may be used and recorded for patients in group R.  
53  
54  
55  
56  
57  
58  
59  
60

## Outcomes

### *Primary outcomes*

The primary outcome of this trial is the numerical rating scale (NRS). NRS allows patients to describe the intensity of pain, which is 11-point scale ranging from 0 to 10, with 0 defined as no pain and 10 defined as the worst pain imaginable<sup>25</sup>. The measurement timepoint of the primary outcome will be two hours before revascularization treatment (T1) and two hours before discharge (T2).

### *Secondary outcomes*

The secondary outcomes are as follows:

- The transcutaneous oxygen pressure (TcPO<sub>2</sub>) at T1 and T2. TcPO<sub>2</sub> will be obtained with PeriFlux System 5000 (PERIMED, Sweden) transcutaneously using the TcPO<sub>2</sub> unit-PF 5040. Calibration will be completed before use. When measuring, patients will be in sitting position. The electrode of the PF 5040 will be placed on the dorsum of the affected foot, away from any skin lesion. Wait 10~15min for a stable reading.
- The tissue hemoglobin index (TOI) at T1 and T2. TOI will be obtained with the EGOS-600A near infrared spectroscopy (NIRS, ENGINMED, China). The transducer of NIRS will be placed at the same spot as PF5040 on a sitting position, after the completion of TcPO<sub>2</sub> measurement. Wait 30 sec for each interval to gain five readings. The values at each time point will be calculated as the mean of five consecutive values over 2min.
- Hospital Anxiety and Depression Scale (HADS) at T1 and T2. HADS is a self-

1  
2  
3  
4 rating patient-reported outcome measure developed to assess depression and  
5  
6 anxiety of patients with illness. The 24-item questionnaire is divided into two  
7  
8 subscales: anxiety (HADS-A) and depression (HADS-D). The ratings are summed  
9  
10 to yield a total score (0 to 42), or for each subscale (0 to 21) with special attention<sup>26</sup>.

- 11  
12  
13  
14 ● Patient Global Impression of Change (PGIC) at T1 and T2. PGIC is a 7-point verbal  
15  
16 scale commonly used to assess patient's perception of pain relief following  
17  
18 treatment, which has been proved its significant relevance and correlations for  
19  
20 peripheral neuropathic pain in daily practice<sup>27</sup>.
- 21  
22  
23  
24 ● Cumulative morphine consumption perioperatively, the sum will be calculated  
25  
26 before discharge.
- 27  
28  
29  
30 ● Length of postoperative hospital stay.
- 31  
32  
33  
34 ● AEs, such as hematoma, catheter displacement, nausea, vomiting, drowsiness,  
35  
36 dizziness, urinary retention, pruritus, local anaesthesia intoxication, etc. The  
37  
38 occurrence time, nature, duration and severity of AEs will all be collected in detail.

### 41 42 43 Trial safety

44  
45 The establishment, configuration and dispensing of the patient-controlled analgesia  
46  
47 devices will be completed by a dependable anesthesiologist. The continuous  
48  
49 ultrasound-guided subgluteal sciatic block will be performed in an operating room, only  
50  
51 after intravenous access and standard monitoring is established for the patient.  
52  
53 Investigators will follow up the patient at least twice a day during the research. All the  
54  
55 reported AEs and other unintended effects of trial conduct will be collected, assessed,  
56  
57  
58  
59  
60



1  
2  
3  
4 reported and managed according to the GCP-ICH guidelines. Any severe AE happens  
5  
6 perioperatively will be reported to the adverse event registration system of the hospital.  
7  
8  
9

#### 10 11 Patient and public involvement

12  
13  
14 Patients and public were not involved in the development of the research question or in  
15  
16 the design of the study. Patients will receive oral and written information about this  
17  
18 trial. However, they will not be involved in the recruitment and conduct of the study.  
19  
20  
21  
22 The burden of the intervention will be assessed by patients themselves. On completion  
23  
24 of the study, dissemination of the general study results or the anonymized individual  
25  
26 patient data will be made on demand.  
27  
28  
29  
30  
31

#### 32 33 Sample size

34  
35 The primary outcome of this trial is the NRS score after analgesia. Sample size was  
36  
37 calculated based on our pilot study which had included ten patients in total (five for  
38  
39 each group). The result of the pilot study showed that the NRS scores in group R and  
40  
41 group I was 1.63 and 3.31, and the standard deviation was 1.85 and 2.12 respectively.  
42  
43  
44 We used the statistical power of 80% and two-sided  $\alpha$  of 0.05. The target sample size  
45  
46 for each group is at least 22 participants. Taking into account a dropout rate of 20%, a  
47  
48 sample size of 52 (26 for each group) was finally determined.  
49  
50  
51  
52  
53  
54  
55

#### 56 57 Data collection, monitoring and confidentiality

58  
59  
60

1  
2  
3  
4 Each patient's ID and demographic information (including age, gender, height, weight)  
5  
6 will be collected. We will document all the AEs related to PCRA or PCIA, including  
7  
8 hematoma, catheter displacement, local anaesthesia intoxication, nausea, dizziness,  
9  
10 urinary retention, pruritus, etc. All the calibration and measurements of TcPO<sub>2</sub> and TOI  
11  
12 will be performed and recorded by one special technician using the same apparatuses.  
13  
14 Collected data will be recorded on paper case report forms (CRFs), then entered into  
15  
16 electronic case report forms (eCRFs) and uploaded to a central server. The CRFs and  
17  
18 eCRFs will be kept for at least five years after publication in case of any inquiry. A  
19  
20 qualified clinical trial expert will be invited in the middle and at the end of the  
21  
22 investigation to ensure that the protocol and GCP-ICH are being followed. No interim  
23  
24 analysis will be performed during the study. Personal information about the enrolled  
25  
26 participants will be safely and confidentially kept. The eCRFs and all the data collected  
27  
28 will be stored anonymously in the password-protected central server and restricted to  
29  
30 relevant members of the research team. Paper copies of the CRFs will be stored in a  
31  
32 locked cabinet in the relevant research office.  
33  
34  
35  
36  
37  
38  
39  
40  
41  
42  
43  
44  
45  
46

#### 47 Statistical analyses

48 Continuous variables will firstly be checked for normality using the visual inspection  
49  
50 of the histogram. Normally distributed continuous variables will be expressed as the  
51  
52 mean  $\pm$  SD, and non-normally distributed continuous variables will be expressed as the  
53  
54 median and interquartile range (IQR). The categorical variables will be summarized as  
55  
56 frequencies and percentages. The primary outcome, difference of NRS between groups,  
57  
58  
59  
60

1  
2  
3  
4 which is generally normally distributed from experience, will be analyzed using  
5  
6 student's *t* test, and the mean difference with corresponding one-sided 95%  
7  
8 confidence interval (CI) will be calculated. For the secondary outcomes including  
9  
10 TcPO<sub>2</sub>, TOI, HADs and PGIC, student's *t* test will be used to compare the group  
11  
12 difference. Data with a skewed distribution, such as cumulative morphine consumption  
13  
14 and length of postoperative hospital stay, will be analyzed using the Mann-Whitney U  
15  
16 test. As categorical variables, AEs will be compared using chi-squared test. The main  
17  
18 analysis will be performed after the study has been completed. Data analysis will be  
19  
20 performed according to the intention to treat principle. The results of this study will be  
21  
22 reported according to the Consolidated Standards of Reporting Trials (CONSORT)  
23  
24 statement<sup>28</sup>. Statistical analyses will be conducted using SPSS 19.0 (Version 22; SPSS  
25  
26 Inc., Chicago, IL, USA). A two-sided  $p < 0.05$  is considered significant.  
27  
28  
29  
30  
31  
32  
33  
34  
35  
36  
37

### 38 Trial status and time scale

39  
40 The study was funded and ethically approved in 2017. A pilot study was conducted  
41  
42 subsequently. We had finished the pilot study by 8 July 2018, then the study was  
43  
44 delayed because of the maternity leave of Si Chen until January 2020. The trial was  
45  
46 registered on 22 January 2020 and will begin to recruit participants on 6 May 2020.  
47  
48  
49  
50  
51

### 52 Abbreviations

53  
54 PAD, peripheral artery disease; CLI, critical limb ischemia; PCRA, patient-controlled  
55  
56 regional analgesia; PCIA, patient-controlled intravenous analgesia; TcPO<sub>2</sub>,  
57  
58  
59  
60

1  
2  
3  
4 transcutaneous oxygen pressure; TOI, tissue hemoglobin index; AE, adverse events;  
5  
6 PUMCH, Peking Union Medical College Hospital; SPIRIT: Standard Protocol Items:  
7  
8 Recommendations for Interventional Trials; GCPs, Good Clinical Practice; ICH,  
9  
10 International Conference on Harmonisation; ASA, American Society of  
11  
12 Anesthesiology; NIRS, near infrared spectroscopy; NRS, numerical rating scale; HAD,  
13  
14 Hospital Anxiety and Depression Scale; PGIC, Patient Global Impression of Change;  
15  
16 VAS, visual analogue scale; CRFs, case report forms, CONSORT, Consolidated  
17  
18 Standards of Reporting Trials; rSO<sub>2</sub>, region tissue oxygenation saturation.  
19  
20  
21  
22  
23  
24  
25  
26

#### 27 Acknowledgements

28  
29 We acknowledge Chinese Anesthesiologist Association for funding this study. We  
30  
31 would also like to thank Dujian Wang for her valuable effort on the investigation.  
32  
33  
34  
35  
36  
37

#### 38 Funding

39  
40 This work was supported by Young Scholar Research Grant of Chinese  
41  
42 Anesthesiologist Association (220160900007). Contact information: +86-0717-  
43  
44 6345093, [mail@ycrenfu.com.cn](mailto:mail@ycrenfu.com.cn). The funders will not participate in the study design  
45  
46 and management; data collection, analysis and interpretation; report writing; or  
47  
48 publication.  
49  
50  
51  
52  
53  
54

#### 55 Steering Committee

56  
57  
58  
59  
60

1  
2  
3  
4 The Steering Committee carries the ultimate responsibility for the trial and has access  
5  
6 to the final dataset. Specific tasks of the Steering Committee are: final approval of the  
7  
8 study protocol, approval of the amendments to the study protocol, approval of  
9  
10 manuscripts and publications of the trial. The members of the Steering Committee in  
11  
12 this trial include: Si Chen, anaesthesiologist; Yuehong Zheng, vascular surgery surgeon;  
13  
14  
15  
16  
17 Yuelun Zhang, statistician.  
18  
19  
20  
21

## 22 Author contributions

23  
24 SC and ZHX are joint first authors. SC obtained funding and the ethical approval,  
25  
26 registered and drafted the manuscript. ZHX and YHZ conceived the study and  
27  
28 participated in the design of the study. YGH, HJL and YXC participated in the study  
29  
30 coordination. YLZ contributed to the statistical analysis plan. JZ acquired and analyzed  
31  
32 the data of the work. YHZ is the corresponding author. He critically edited the  
33  
34 manuscript. All authors read and approved the final manuscript.  
35  
36  
37  
38  
39  
40  
41  
42

## 43 Ethics approval and consent to participate

44  
45 This research project was approved by the Peking Union Medical College Hospital  
46  
47 Institutional Review Board (ZS-1289X) on 21 March 2017. Important protocol  
48  
49 amendments will be communicated to relevant parties (eg, investigators, IRB, trial  
50  
51 participants, trial registries, journals) by Dr. Yuehong Zheng, trial principal investigator,  
52  
53 as soon as changes are made. Written informed consent (details see Appendix 2) will  
54  
55  
56  
57  
58  
59  
60 be obtained from all participants.

## Dissemination plan

The result of this study will be presented in national and international meetings and will be submitted for publication to relevant vascular surgery, analgesia or anaesthesia peer-reviewed journals.

## Consent for publication

All authors approved the final manuscript and agreed the submission.

## Competing interests

All authors have completed the ICMJE uniform disclosure form at [http://www.icmje.org/coi\\_disclosure.pdf](http://www.icmje.org/coi_disclosure.pdf) and declare: no financial relationships with any organization that might have an interest in the submitted work in the previous three years, no other relationships or activities that could appear to have influenced the submitted work. There is no conflict of interests.

## Data sharing

No additional data are available.

## References

1. Norgren L, Hiatt WR, Dormandy JA, *et al.* Inter-society consensus for the management of peripheral arterial disease (TASC II). *J Vasc Surg* 2007;45(suppl S):S5-S67.
2. Fontaine R, Kim M, Kieny R. Surgical treatment of peripheral circulation disorders. *Helv Chim Acta* 1954;21(5-6):499-533.

- 1
  - 2
  - 3
  - 4
  - 5
  - 6
  - 7
  - 8
  - 9
  - 10
  - 11
  - 12
  - 13
  - 14
  - 15
  - 16
  - 17
  - 18
  - 19
  - 20
  - 21
  - 22
  - 23
  - 24
  - 25
  - 26
  - 27
  - 28
  - 29
  - 30
  - 31
  - 32
  - 33
  - 34
  - 35
  - 36
  - 37
  - 38
  - 39
  - 40
  - 41
  - 42
  - 43
  - 44
  - 45
  - 46
  - 47
  - 48
  - 49
  - 50
  - 51
  - 52
  - 53
  - 54
  - 55
  - 56
  - 57
  - 58
  - 59
  - 60
3. Nehler MR, Duval S, Diao L, *et al.* Epidemiology of peripheral arterial disease and critical limb ischemia in an insured national population. *J Vasc Surg* 2014;60(3):686-95.e2.
  4. Patel MR, Conte MS, Cutlip DE, *et al.* Evaluation and treatment of patients with lower extremity peripheral artery disease: consensus definitions from Peripheral Academic Research Consortium (PARC). *J Am Coll Cardiol* 2015;65(9):931-941.
  5. Farber A, Eberhardt RT. The Current State of Critical Limb Ischemia: A Systematic Review. *JAMA Surg* 2016;151(11):1070–1077.
  6. Collins TC, Beyth RJ, Nelson DB, *et al.* Process of care and outcomes in patients with peripheral arterial disease. *J Gen Intern Med* 2007;22(7):942–948.
  7. Wu CL, Tella P, Staats PS, *et al.* Analgesic effects of intravenous lidocaine and morphine on postamputation pain: a randomized double-blind, active placebo-controlled, crossover trial. *Anesthesiology* 2002;96(4):841–848.
  8. Bloomquist T. Amputation and phantom limb pain: a pain-prevention model. *AANA J* 2001;69(3):211–217.
  9. Taylor A, Stanbury L. A review of postoperative pain management and the challenges. *Curr Opin Anaesthesiol* 2009;20(4):188-194.
  10. Vahidi E, Shakoor D, Aghaie Meybodi M, *et al.* Comparison of intravenous lidocaine versus morphine in alleviating pain in patients with critical limb ischaemia. *Emerg Med J* 2015;32(7):516–519
  11. Azuma N, Kikuchi S, Okuda H, *et al.* Recent Progress of Bypass Surgery to the Dialysis-Dependent Patients with Critical Limb Ischemia. *Ann Vasc Dis* 2017;10(3):178–184.
  12. Tureli D, Deniz S, Unlukaplan A, *et al.* Ultrasound-Guided Popliteal Sciatic Block Provides Adequate Analgesia During Urgent Endovascular Treatment of Critical Limb Ischemia with Resting Pain. *Cardiovasc Intervent Radiol* 2018;41(1):43–48.
  13. Sgroi MD, McFarland G, Mell MW. Utilization of regional versus general anesthesia and its impact on lower extremity bypass outcomes. *J Vasc Surg* 2019;69(6):1874–1879.
  14. Kontopodis N, Papaioannou A, Tavlas E, *et al.* The use of local anesthesia to perform lower limb revascularization in the fragile patient with critical limb ischemia. *G Chir* 2018;39(2):77–81.
  15. Di Minno MN, Milone M, Russolillo A, *et al.* Ropivacaine infusion in diabetics subject with peripheral arterial disease. A prospective study. *Exp Clin Endocrinol Diabetes* 2013;121(2):91–93.
  16. Cobb J, Claremont D. Noninvasive measurement techniques for monitoring of microvascular function in the diabetic foot. *Int J Low Extrem Wounds* 2002;1(3):161–169.
  17. Laoire ÁN, Murtagh FEM. Systematic review of pharmacological therapies for the management of ischaemic pain in patients with non-reconstructable critical limb ischaemia. *BMJ Support Palliat Care* 2018;8(4):400–410.
  18. Mifsud M, Cassar K. The Use of Transcutaneous Electrical Stimulation of the Calf in Patients Undergoing Infrainguinal Bypass Surgery. *Ann Vasc Surg* 2015;29(8):1524–1532.
  19. Persiani F, Paolini A, Camilli D, *et al.* Peripheral Blood Mononuclear Cells Therapy for Treatment of Lower Limb Ischemia in Diabetic Patients: A Single-Center Experience. *Ann Vasc Surg* 2018;53:190–196.
  20. Karanth VKL, Karanth TK, Sun Z, *et al.* Lumbar sympathectomy techniques for critical lower limb ischaemia due to non-reconstructable peripheral arterial disease. *Cochrane Database Syst Rev* 2016;(12).

- 1
  - 2
  - 3
  - 4
  - 5
  - 6
  - 7
  - 8
  - 9
  - 10
  - 11
  - 12
  - 13
  - 14
  - 15
  - 16
  - 17
  - 18
  - 19
  - 20
  - 21
  - 22
  - 23
  - 24
  - 25
  - 26
  - 27
  - 28
  - 29
  - 30
  - 31
  - 32
  - 33
  - 34
  - 35
  - 36
  - 37
  - 38
  - 39
  - 40
  - 41
  - 42
  - 43
  - 44
  - 45
  - 46
  - 47
  - 48
  - 49
  - 50
  - 51
  - 52
  - 53
  - 54
  - 55
  - 56
  - 57
  - 58
  - 59
  - 60
21. King R, Mariano ER, Yajnik M, *et al.* Outcomes of Ambulatory Upper Extremity Surgery Patients Discharged Home with Perineural Catheters from a Veterans Health Administration Medical Center. *Pain Med* 2019;20(11): 2256-2262.
22. Ilfeld BM, Morey TE, Wang RD, *et al.* Continuous popliteal sciatic nerve block for postoperative pain control at home: a randomized, double-blinded, placebo-controlled study. *Anesthesiology* 2002;97(4):959–965.
23. Chan AW, Tetzlaff JM, Gotzsche PC, *et al.* SPIRIT 2013 explanation and elaboration: guidance for protocols of clinical trials. *BMJ* 2013;346:e7586.
24. Rutherford R B, Baker J D, Ernst C, *et al.* Recommended standards for reports dealing with lower extremity ischemia: revised version. *J vasc surg* 1997;26(3):517-538.
25. Lee JJ, Lee MK, Kim JE, *et al.* Pain relief scale is more highly correlated with numerical rating scale than with visual analogue scale in chronic pain patients. *Pain Physician* 2015;18(2):E195–200.
26. Beekman E, Verhagen A. Clinimetrics: Hospital Anxiety and Depression Scale. *J physiother* 2018; 64(3):198.
27. Perrot S, Lantéri-Minet M. Patients’ Global Impression of Change in the management of peripheral neuropathic pain: Clinical relevance and correlations in daily practice. *Eur J Pain* 2019;23(6):1117-1128.
28. Moher D, Hopewell S, Schulz KF, *et al.* CONSORT 2010 Explanation and elaboration: updated guidelines for reporting parallel group randomised trials. *J Clin Epidemiol* 2010;63:e1–37.



1  
2  
3  
4  
5  
6  
7  
8  
9  
10  
11  
12  
13  
14  
15  
16  
17  
18  
19  
20  
21  
22  
23  
24  
25  
26  
27  
28  
29  
30  
31  
32  
33  
34  
35  
36  
37  
38  
39  
40  
41  
42  
43  
44  
45  
46  
47  
48  
49  
50  
51  
52  
53  
54  
55  
56  
57  
58  
59  
60

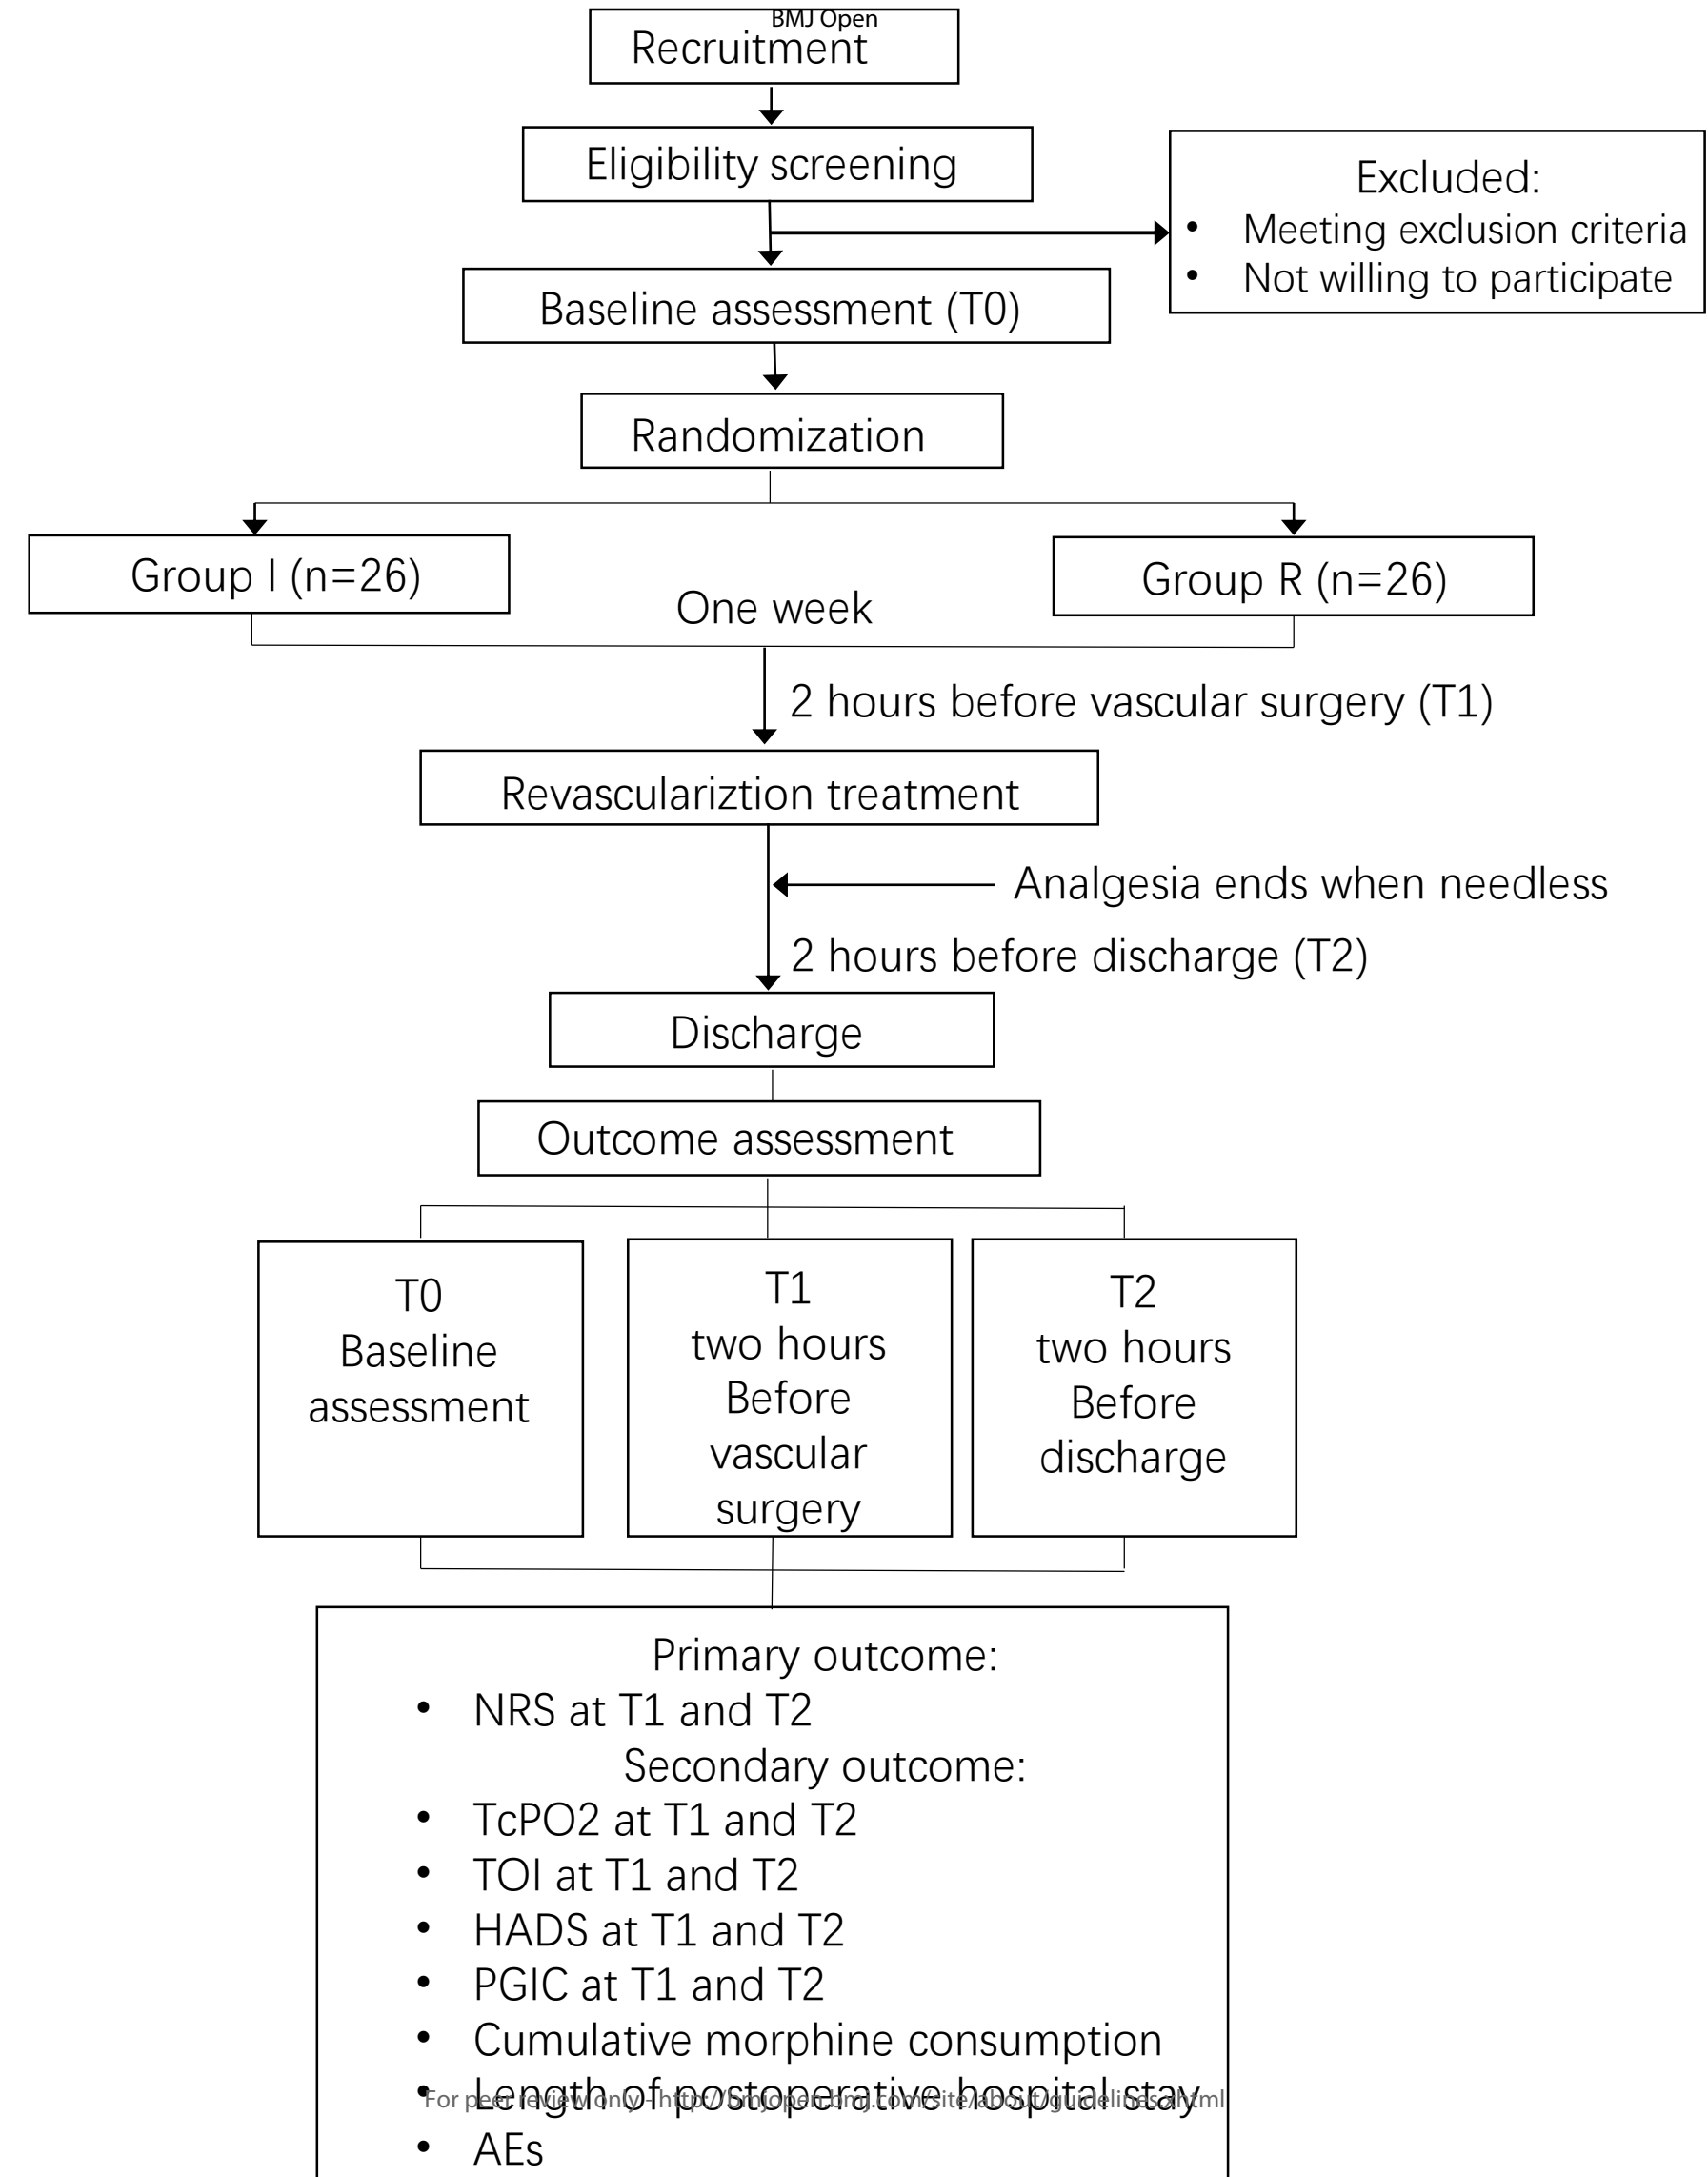



# Reporting checklist for protocol of a clinical trial.

Based on the SPIRIT guidelines.

## Instructions to authors

Complete this checklist by entering the page numbers from your manuscript where readers will find each of the items listed below.

Your article may not currently address all the items on the checklist. Please modify your text to include the missing information. If you are certain that an item does not apply, please write "n/a" and provide a short explanation.

Upload your completed checklist as an extra file when you submit to a journal.

In your methods section, say that you used the SPIRIT reporting guidelines, and cite them as:

Chan A-W, Tetzlaff JM, Altman DG, Laupacis A, Gøtzsche PC, Krleža-Jerić K, Hróbjartsson A, Mann H, Dickersin K, Berlin J, Doré C, Parulekar W, Summerskill W, Groves T, Schulz K, Sox H, Rockhold FW, Rennie D, Moher D. SPIRIT 2013 Statement: Defining standard protocol items for clinical trials. *Ann Intern Med.* 2013;158(3):200-207

|                                             |                     | Reporting Item                                                                                               | Page Number |
|---------------------------------------------|---------------------|--------------------------------------------------------------------------------------------------------------|-------------|
| <b>Administrative information</b>           |                     |                                                                                                              |             |
| Title                                       | <a href="#">#1</a>  | Descriptive title identifying the study design, population, interventions, and, if applicable, trial acronym | 1           |
| Trial registration                          | <a href="#">#2a</a> | Trial identifier and registry name. If not yet registered, name of intended registry                         | 2, 8        |
| Trial registration: data set                | <a href="#">#2b</a> | All items from the World Health Organization Trial Registration Data Set                                     | 2, 3        |
| Protocol version                            | <a href="#">#3</a>  | Date and version identifier                                                                                  | 3           |
| Funding                                     | <a href="#">#4</a>  | Sources and types of financial, material, and other support                                                  | 17          |
| Roles and responsibilities: contributorship | <a href="#">#5a</a> | Names, affiliations, and roles of protocol contributors                                                      | 1, 17       |

|    |                           |                     |                                                                      |        |
|----|---------------------------|---------------------|----------------------------------------------------------------------|--------|
| 1  | Roles and                 | <a href="#">#5b</a> | Name and contact information for the trial sponsor                   | 17     |
| 2  | responsibilities:         |                     |                                                                      |        |
| 3  | sponsor contact           |                     |                                                                      |        |
| 4  | information               |                     |                                                                      |        |
| 5  |                           |                     |                                                                      |        |
| 6  |                           |                     |                                                                      |        |
| 7  |                           |                     |                                                                      |        |
| 8  | Roles and                 | <a href="#">#5c</a> | Role of study sponsor and funders, if any, in study design;          | 17     |
| 9  | responsibilities:         |                     | collection, management, analysis, and interpretation of data;        |        |
| 10 | sponsor and funder        |                     | writing of the report; and the decision to submit the report for     |        |
| 11 |                           |                     | publication, including whether they will have ultimate authority     |        |
| 12 |                           |                     | over any of these activities                                         |        |
| 13 |                           |                     |                                                                      |        |
| 14 |                           |                     |                                                                      |        |
| 15 |                           |                     |                                                                      |        |
| 16 | Roles and                 | <a href="#">#5d</a> | Composition, roles, and responsibilities of the coordinating centre, | 17, 18 |
| 17 | responsibilities:         |                     | steering committee, endpoint adjudication committee, data            |        |
| 18 | committees                |                     | management team, and other individuals or groups overseeing the      |        |
| 19 |                           |                     | trial, if applicable (see Item 21a for data monitoring committee)    |        |
| 20 |                           |                     |                                                                      |        |
| 21 |                           |                     |                                                                      |        |
| 22 |                           |                     |                                                                      |        |
| 23 | <b>Introduction</b>       |                     |                                                                      |        |
| 24 |                           |                     |                                                                      |        |
| 25 | Background and            | <a href="#">#6a</a> | Description of research question and justification for undertaking   | 5      |
| 26 | rationale                 |                     | the trial, including summary of relevant studies (published and      |        |
| 27 |                           |                     | unpublished) examining benefits and harms for each intervention      |        |
| 28 |                           |                     |                                                                      |        |
| 29 |                           |                     |                                                                      |        |
| 30 | Background and            | <a href="#">#6b</a> | Explanation for choice of comparators                                | 6      |
| 31 | rationale: choice of      |                     |                                                                      |        |
| 32 | comparators               |                     |                                                                      |        |
| 33 |                           |                     |                                                                      |        |
| 34 |                           |                     |                                                                      |        |
| 35 |                           |                     |                                                                      |        |
| 36 | Objectives                | <a href="#">#7</a>  | Specific objectives or hypotheses                                    | 7      |
| 37 |                           |                     |                                                                      |        |
| 38 | Trial design              | <a href="#">#8</a>  | Description of trial design including type of trial (eg, parallel    | 7, 8   |
| 39 |                           |                     | group, crossover, factorial, single group), allocation ratio, and    |        |
| 40 |                           |                     | framework (eg, superiority, equivalence, non-inferiority,            |        |
| 41 |                           |                     | exploratory)                                                         |        |
| 42 |                           |                     |                                                                      |        |
| 43 |                           |                     |                                                                      |        |
| 44 |                           |                     |                                                                      |        |
| 45 | <b>Methods:</b>           |                     |                                                                      |        |
| 46 | <b>Participants,</b>      |                     |                                                                      |        |
| 47 | <b>interventions, and</b> |                     |                                                                      |        |
| 48 | <b>outcomes</b>           |                     |                                                                      |        |
| 49 |                           |                     |                                                                      |        |
| 50 |                           |                     |                                                                      |        |
| 51 |                           |                     |                                                                      |        |
| 52 | Study setting             | <a href="#">#9</a>  | Description of study settings (eg, community clinic, academic        | 8      |
| 53 |                           |                     | hospital) and list of countries where data will be collected.        |        |
| 54 |                           |                     | Reference to where list of study sites can be obtained               |        |
| 55 |                           |                     |                                                                      |        |
| 56 |                           |                     |                                                                      |        |
| 57 | Eligibility criteria      | <a href="#">#10</a> | Inclusion and exclusion criteria for participants. If applicable,    | 8      |
| 58 |                           |                     | eligibility criteria for study centres and individuals who will      |        |
| 59 |                           |                     |                                                                      |        |
| 60 |                           |                     |                                                                      |        |

|    |                              |                                                                                            |        |
|----|------------------------------|--------------------------------------------------------------------------------------------|--------|
|    |                              | perform the interventions (eg, surgeons, psychotherapists)                                 |        |
| 1  |                              |                                                                                            |        |
| 2  | Interventions:               | <a href="#">#11a</a> Interventions for each group with sufficient detail to allow          | 10     |
| 3  | description                  | replication, including how and when they will be administered                              |        |
| 4  |                              |                                                                                            |        |
| 5  | Interventions:               | <a href="#">#11b</a> Criteria for discontinuing or modifying allocated interventions for a | 11     |
| 6  | modifications                | given trial participant (eg, drug dose change in response to harms,                        |        |
| 7  |                              | participant request, or improving / worsening disease)                                     |        |
| 8  |                              |                                                                                            |        |
| 9  | Interventions:               | <a href="#">#11c</a> Strategies to improve adherence to intervention protocols, and any    | 11, 13 |
| 10 | adherence                    | procedures for monitoring adherence (eg, drug tablet return;                               |        |
| 11 |                              | laboratory tests)                                                                          |        |
| 12 | Interventions:               | <a href="#">#11d</a> Relevant concomitant care and interventions that are permitted or     | 11     |
| 13 | concomitant care             | prohibited during the trial                                                                |        |
| 14 |                              |                                                                                            |        |
| 15 | Outcomes                     | <a href="#">#12</a> Primary, secondary, and other outcomes, including the specific         | 12, 13 |
| 16 |                              | measurement variable (eg, systolic blood pressure), analysis metric                        |        |
| 17 |                              | (eg, change from baseline, final value, time to event), method of                          |        |
| 18 |                              | aggregation (eg, median, proportion), and time point for each                              |        |
| 19 |                              | outcome. Explanation of the clinical relevance of chosen efficacy                          |        |
| 20 |                              | and harm outcomes is strongly recommended                                                  |        |
| 21 | Participant timeline         | <a href="#">#13</a> Time schedule of enrolment, interventions (including any run-ins       | 8      |
| 22 |                              | and washouts), assessments, and visits for participants. A                                 |        |
| 23 |                              | schematic diagram is highly recommended (see Figure)                                       |        |
| 24 |                              |                                                                                            |        |
| 25 | Sample size                  | <a href="#">#14</a> Estimated number of participants needed to achieve study               | 14     |
| 26 |                              | objectives and how it was determined, including clinical and                               |        |
| 27 |                              | statistical assumptions supporting any sample size calculations                            |        |
| 28 |                              |                                                                                            |        |
| 29 | Recruitment                  | <a href="#">#15</a> Strategies for achieving adequate participant enrolment to reach       | 14     |
| 30 |                              | target sample size                                                                         |        |
| 31 |                              |                                                                                            |        |
| 32 |                              |                                                                                            |        |
| 33 |                              |                                                                                            |        |
| 34 |                              |                                                                                            |        |
| 35 |                              |                                                                                            |        |
| 36 |                              |                                                                                            |        |
| 37 |                              |                                                                                            |        |
| 38 |                              |                                                                                            |        |
| 39 |                              |                                                                                            |        |
| 40 |                              |                                                                                            |        |
| 41 |                              |                                                                                            |        |
| 42 |                              |                                                                                            |        |
| 43 |                              |                                                                                            |        |
| 44 |                              |                                                                                            |        |
| 45 | <b>Methods: Assignment</b>   |                                                                                            |        |
| 46 | <b>of interventions (for</b> |                                                                                            |        |
| 47 | <b>controlled trials)</b>    |                                                                                            |        |
| 48 |                              |                                                                                            |        |
| 49 |                              |                                                                                            |        |
| 50 | Allocation: sequence         | <a href="#">#16a</a> Method of generating the allocation sequence (eg, computer-           | 9, 10  |
| 51 | generation                   | generated random numbers), and list of any factors for                                     |        |
| 52 |                              | stratification. To reduce predictability of a random sequence,                             |        |
| 53 |                              | details of any planned restriction (eg, blocking) should be provided                       |        |
| 54 |                              | in a separate document that is unavailable to those who enrol                              |        |
| 55 |                              | participants or assign interventions                                                       |        |
| 56 |                              |                                                                                            |        |
| 57 |                              |                                                                                            |        |
| 58 |                              |                                                                                            |        |
| 59 |                              |                                                                                            |        |
| 60 |                              |                                                                                            |        |

|    |                        |                      |                                                                       |        |
|----|------------------------|----------------------|-----------------------------------------------------------------------|--------|
| 1  | Allocation concealment | <a href="#">#16b</a> | Mechanism of implementing the allocation sequence (eg, central        | 10     |
| 2  | mechanism              |                      | telephone; sequentially numbered, opaque, sealed envelopes),          |        |
| 3  |                        |                      | describing any steps to conceal the sequence until interventions are  |        |
| 4  |                        |                      | assigned                                                              |        |
| 5  |                        |                      |                                                                       |        |
| 6  |                        |                      |                                                                       |        |
| 7  |                        |                      |                                                                       |        |
| 8  | Allocation:            | <a href="#">#16c</a> | Who will generate the allocation sequence, who will enrol             | 9, 10  |
| 9  | implementation         |                      | participants, and who will assign participants to interventions       |        |
| 10 |                        |                      |                                                                       |        |
| 11 | Blinding (masking)     | <a href="#">#17a</a> | Who will be blinded after assignment to interventions (eg, trial      | 10     |
| 12 |                        |                      | participants, care providers, outcome assessors, data analysts), and  |        |
| 13 |                        |                      | how                                                                   |        |
| 14 |                        |                      |                                                                       |        |
| 15 |                        |                      |                                                                       |        |
| 16 |                        |                      |                                                                       |        |
| 17 | Blinding (masking):    | <a href="#">#17b</a> | If blinded, circumstances under which unblinding is permissible,      | 10     |
| 18 | emergency unblinding   |                      | and procedure for revealing a participant's allocated intervention    |        |
| 19 |                        |                      | during the trial                                                      |        |
| 20 |                        |                      |                                                                       |        |
| 21 |                        |                      |                                                                       |        |
| 22 | <b>Methods: Data</b>   |                      |                                                                       |        |
| 23 | <b>collection,</b>     |                      |                                                                       |        |
| 24 | <b>management, and</b> |                      |                                                                       |        |
| 25 | <b>analysis</b>        |                      |                                                                       |        |
| 26 |                        |                      |                                                                       |        |
| 27 |                        |                      |                                                                       |        |
| 28 |                        |                      |                                                                       |        |
| 29 | Data collection plan   | <a href="#">#18a</a> | Plans for assessment and collection of outcome, baseline, and other   | 14     |
| 30 |                        |                      | trial data, including any related processes to promote data quality   |        |
| 31 |                        |                      | (eg, duplicate measurements, training of assessors) and a             |        |
| 32 |                        |                      | description of study instruments (eg, questionnaires, laboratory      |        |
| 33 |                        |                      | tests) along with their reliability and validity, if known. Reference |        |
| 34 |                        |                      | to where data collection forms can be found, if not in the protocol   |        |
| 35 |                        |                      |                                                                       |        |
| 36 |                        |                      |                                                                       |        |
| 37 |                        |                      |                                                                       |        |
| 38 |                        |                      |                                                                       |        |
| 39 | Data collection plan:  | <a href="#">#18b</a> | Plans to promote participant retention and complete follow-up,        | 9      |
| 40 | retention              |                      | including list of any outcome data to be collected for participants   |        |
| 41 |                        |                      | who discontinue or deviate from intervention protocols                |        |
| 42 |                        |                      |                                                                       |        |
| 43 |                        |                      |                                                                       |        |
| 44 | Data management        | <a href="#">#19</a>  | Plans for data entry, coding, security, and storage, including any    | 14, 15 |
| 45 |                        |                      | related processes to promote data quality (eg, double data entry;     |        |
| 46 |                        |                      | range checks for data values). Reference to where details of data     |        |
| 47 |                        |                      | management procedures can be found, if not in the protocol            |        |
| 48 |                        |                      |                                                                       |        |
| 49 |                        |                      |                                                                       |        |
| 50 |                        |                      |                                                                       |        |
| 51 | Statistics: outcomes   | <a href="#">#20a</a> | Statistical methods for analysing primary and secondary outcomes.     | 15     |
| 52 |                        |                      | Reference to where other details of the statistical analysis plan can |        |
| 53 |                        |                      | be found, if not in the protocol                                      |        |
| 54 |                        |                      |                                                                       |        |
| 55 |                        |                      |                                                                       |        |
| 56 | Statistics: additional | <a href="#">#20b</a> | Methods for any additional analyses (eg, subgroup and adjusted        | N/A    |
| 57 | analyses               |                      | analyses)                                                             |        |
| 58 |                        |                      |                                                                       |        |
| 59 |                        |                      |                                                                       |        |
| 60 |                        |                      |                                                                       |        |

|    |                            |                      |                                                                         |        |
|----|----------------------------|----------------------|-------------------------------------------------------------------------|--------|
| 1  | Statistics: analysis       | <a href="#">#20c</a> | Definition of analysis population relating to protocol non-             | N/A    |
| 2  | population and missing     |                      | adherence (eg, as randomised analysis), and any statistical methods     |        |
| 3  | data                       |                      | to handle missing data (eg, multiple imputation)                        |        |
| 4  |                            |                      |                                                                         |        |
| 5  |                            |                      |                                                                         |        |
| 6  | <b>Methods: Monitoring</b> |                      |                                                                         |        |
| 7  |                            |                      |                                                                         |        |
| 8  | Data monitoring:           | <a href="#">#21a</a> | Composition of data monitoring committee (DMC); summary of its          | 15     |
| 9  | formal committee           |                      | role and reporting structure; statement of whether it is independent    |        |
| 10 |                            |                      | from the sponsor and competing interests; and reference to where        |        |
| 11 |                            |                      | further details about its charter can be found, if not in the protocol. |        |
| 12 |                            |                      | Alternatively, an explanation of why a DMC is not needed                |        |
| 13 |                            |                      |                                                                         |        |
| 14 |                            |                      |                                                                         |        |
| 15 |                            |                      |                                                                         |        |
| 16 |                            |                      |                                                                         |        |
| 17 | Data monitoring:           | <a href="#">#21b</a> | Description of any interim analyses and stopping guidelines,            | 15, 16 |
| 18 | interim analysis           |                      | including who will have access to these interim results and make        |        |
| 19 |                            |                      | the final decision to terminate the trial                               |        |
| 20 |                            |                      |                                                                         |        |
| 21 |                            |                      |                                                                         |        |
| 22 | Harms                      | <a href="#">#22</a>  | Plans for collecting, assessing, reporting, and managing solicited      | 14     |
| 23 |                            |                      | and spontaneously reported adverse events and other unintended          |        |
| 24 |                            |                      | effects of trial interventions or trial conduct                         |        |
| 25 |                            |                      |                                                                         |        |
| 26 |                            |                      |                                                                         |        |
| 27 | Auditing                   | <a href="#">#23</a>  | Frequency and procedures for auditing trial conduct, if any, and        | 17     |
| 28 |                            |                      | whether the process will be independent from investigators and the      |        |
| 29 |                            |                      | sponsor                                                                 |        |
| 30 |                            |                      |                                                                         |        |
| 31 |                            |                      |                                                                         |        |
| 32 |                            |                      |                                                                         |        |
| 33 | <b>Ethics and</b>          |                      |                                                                         |        |
| 34 | <b>dissemination</b>       |                      |                                                                         |        |
| 35 |                            |                      |                                                                         |        |
| 36 |                            |                      |                                                                         |        |
| 37 | Research ethics            | <a href="#">#24</a>  | Plans for seeking research ethics committee / institutional review      | 3, 18  |
| 38 | approval                   |                      | board (REC / IRB) approval                                              |        |
| 39 |                            |                      |                                                                         |        |
| 40 |                            |                      |                                                                         |        |
| 41 | Protocol amendments        | <a href="#">#25</a>  | Plans for communicating important protocol modifications (eg,           | 18     |
| 42 |                            |                      | changes to eligibility criteria, outcomes, analyses) to relevant        |        |
| 43 |                            |                      | parties (eg, investigators, REC / IRBs, trial participants, trial       |        |
| 44 |                            |                      | registries, journals, regulators)                                       |        |
| 45 |                            |                      |                                                                         |        |
| 46 |                            |                      |                                                                         |        |
| 47 | Consent or assent          | <a href="#">#26a</a> | Who will obtain informed consent or assent from potential trial         | 8,10   |
| 48 |                            |                      | participants or authorised surrogates, and how (see Item 32)            |        |
| 49 |                            |                      |                                                                         |        |
| 50 |                            |                      |                                                                         |        |
| 51 | Consent or assent:         | <a href="#">#26b</a> | Additional consent provisions for collection and use of participant     | N/A    |
| 52 | ancillary studies          |                      | data and biological specimens in ancillary studies, if applicable       |        |
| 53 |                            |                      |                                                                         |        |
| 54 |                            |                      |                                                                         |        |
| 55 | Confidentiality            | <a href="#">#27</a>  | How personal information about potential and enrolled participants      | 14, 15 |
| 56 |                            |                      | will be collected, shared, and maintained in order to protect           |        |
| 57 |                            |                      | confidentiality before, during, and after the trial                     |        |
| 58 |                            |                      |                                                                         |        |
| 59 |                            |                      |                                                                         |        |
| 60 |                            |                      |                                                                         |        |

|    |                                             |                      |                                                                                                                                                                                                                                                                                     |        |
|----|---------------------------------------------|----------------------|-------------------------------------------------------------------------------------------------------------------------------------------------------------------------------------------------------------------------------------------------------------------------------------|--------|
| 1  | Declaration of interests                    | <a href="#">#28</a>  | Financial and other competing interests for principal investigators for the overall trial and each study site                                                                                                                                                                       | 17, 19 |
| 2  |                                             |                      |                                                                                                                                                                                                                                                                                     |        |
| 3  |                                             |                      |                                                                                                                                                                                                                                                                                     |        |
| 4  |                                             |                      |                                                                                                                                                                                                                                                                                     |        |
| 5  | Data access                                 | <a href="#">#29</a>  | Statement of who will have access to the final trial dataset, and disclosure of contractual agreements that limit such access for investigators                                                                                                                                     | 17, 18 |
| 6  |                                             |                      |                                                                                                                                                                                                                                                                                     |        |
| 7  |                                             |                      |                                                                                                                                                                                                                                                                                     |        |
| 8  |                                             |                      |                                                                                                                                                                                                                                                                                     |        |
| 9  |                                             |                      |                                                                                                                                                                                                                                                                                     |        |
| 10 | Ancillary and post trial care               | <a href="#">#30</a>  | Provisions, if any, for ancillary and post-trial care, and for compensation to those who suffer harm from trial participation                                                                                                                                                       | 13, 14 |
| 11 |                                             |                      |                                                                                                                                                                                                                                                                                     |        |
| 12 |                                             |                      |                                                                                                                                                                                                                                                                                     |        |
| 13 |                                             |                      |                                                                                                                                                                                                                                                                                     |        |
| 14 | Dissemination policy: trial results         | <a href="#">#31a</a> | Plans for investigators and sponsor to communicate trial results to participants, healthcare professionals, the public, and other relevant groups (eg, via publication, reporting in results databases, or other data sharing arrangements), including any publication restrictions | 14, 15 |
| 15 |                                             |                      |                                                                                                                                                                                                                                                                                     |        |
| 16 |                                             |                      |                                                                                                                                                                                                                                                                                     |        |
| 17 |                                             |                      |                                                                                                                                                                                                                                                                                     |        |
| 18 |                                             |                      |                                                                                                                                                                                                                                                                                     |        |
| 19 |                                             |                      |                                                                                                                                                                                                                                                                                     |        |
| 20 |                                             |                      |                                                                                                                                                                                                                                                                                     |        |
| 21 | Dissemination policy: authorship            | <a href="#">#31b</a> | Authorship eligibility guidelines and any intended use of professional writers                                                                                                                                                                                                      | 17     |
| 22 |                                             |                      |                                                                                                                                                                                                                                                                                     |        |
| 23 |                                             |                      |                                                                                                                                                                                                                                                                                     |        |
| 24 | Dissemination policy: reproducible research | <a href="#">#31c</a> | Plans, if any, for granting public access to the full protocol, participant-level dataset, and statistical code                                                                                                                                                                     | 19     |
| 25 |                                             |                      |                                                                                                                                                                                                                                                                                     |        |
| 26 |                                             |                      |                                                                                                                                                                                                                                                                                     |        |
| 27 |                                             |                      |                                                                                                                                                                                                                                                                                     |        |
| 28 | <b>Appendices</b>                           |                      |                                                                                                                                                                                                                                                                                     |        |
| 29 |                                             |                      |                                                                                                                                                                                                                                                                                     |        |
| 30 |                                             |                      |                                                                                                                                                                                                                                                                                     |        |
| 31 | Informed consent materials                  | <a href="#">#32</a>  | Model consent form and other related documentation given to participants and authorised surrogates                                                                                                                                                                                  | 18     |
| 32 |                                             |                      |                                                                                                                                                                                                                                                                                     |        |
| 33 |                                             |                      |                                                                                                                                                                                                                                                                                     |        |
| 34 |                                             |                      |                                                                                                                                                                                                                                                                                     |        |
| 35 | Biological specimens                        | <a href="#">#33</a>  | Plans for collection, laboratory evaluation, and storage of biological specimens for genetic or molecular analysis in the current trial and for future use in ancillary studies, if applicable                                                                                      | N/A    |
| 36 |                                             |                      |                                                                                                                                                                                                                                                                                     |        |
| 37 |                                             |                      |                                                                                                                                                                                                                                                                                     |        |
| 38 |                                             |                      |                                                                                                                                                                                                                                                                                     |        |
| 39 |                                             |                      |                                                                                                                                                                                                                                                                                     |        |

40 The SPIRIT checklist is distributed under the terms of the Creative Commons Attribution License CC-BY-ND  
 41 3.0. This checklist was completed on 19. February 2020 using <https://www.goodreports.org/>, a tool made by the  
 42 [EQUATOR Network](#) in collaboration with [Penelope.ai](#)  
 43  
 44  
 45  
 46  
 47  
 48  
 49  
 50  
 51  
 52  
 53  
 54  
 55  
 56  
 57  
 58  
 59  
 60



## 受试者知情同意书

**研究项目名称：**不同镇痛方式用于重症下肢缺血患者的围术期作用效果研究

**研究负责人：**陈思

**联系电话：**13466364034

**研究单位：**中国医学科学院北京协和医院

- 研究背景、目的：**重症下肢缺血以静息痛、溃疡、坏疽为主要特征。疼痛刺激不仅降低患者的生活质量，还可诱发心脑血管事件、进一步加重神经病理性改变。良好的疼痛管理可帮助患者减轻临床症状、延缓病情发展、改善生活质量、延长生存周期。本研究目的在于比较病人自控周围神经连续阻滞技术(方法1)与病人自控静脉镇痛技术(方法2)在患者围术期的镇痛效果以及其对下肢血流灌注的改善作用。其中，方法1属疼痛介入治疗，通过坐骨神经周围置管完成，优势在于能够扩张下肢血管、减少患者阿片类药物使用量、镇痛效果明确；不足在于属有创操作，导管置于体内，有渗漏、移位、感染等风险。方法2通过静脉持续使用阿片类药物完成，优势在于镇痛效果明确，不足在于有嗜睡、头晕、恶心、呕吐、瘙痒、阿片类药物过量、耐受等风险。
- 研究内容、方法及程序：**入院后将随机为患者选取一种镇痛方式，在镇痛前后分别进行以下内容：
  - 常规疼痛诊疗：**治疗疼痛、协助医生评估镇痛效果；
  - 研究所附加的诊疗项目：**填写调查问卷、测量皮肤温度及患肢血流速度（无创伤）。
- 参加研究的可能风险（或不适、不便）和收益（个人或社会群体受益）：**
  - 可能风险（或不适、不便）：**携带病人自控镇痛装置可能存在轻微不便，
  - 收益：**获得更为确切、舒适的疼痛诊疗体验和更密切的镇痛随访，对于未来此类患者的治疗选择将更加有益。
- 有关内容的咨询：**您有权就有关研究内容进行咨询，咨询电话（研究者电话）：13466364034；且您有权就有关您的权利或相关风险等问题进行咨询，咨询电话（伦理审查委员会电话）：69154494
- 退出研究的权利：**您参加此项研究是完全自愿的。无需任何原因，您不愿意参加或不愿继续参加此研究，并不会对您的权益有任何影响。此外，您有权在任何时间退出此研究。（如果您没有按医生指示，或医生为您的健康和益处着想，医生或研究者也可能要求您退出。）
- 研究的费用及赔偿问题：**常规疼痛诊疗产生的费用由您及患者自行缴纳的医疗保险承担及赔付；研究所附加的诊疗项目产生的费用由课题组经费承担，如果您由于参加此研究所附加的项目而使健康受到损害，将由北京协和医院麻醉科及血管外科负责提供补偿费用。
- 保密制度：**您参加此研究所获得的医疗信息将得到保密。研究结果在学术刊物上发表时也不会泄露任何可识别您个人身份的信息。北京协和医院将保存您在这项研究中的全部记录以及有关的医院和办公室记录，未经授权任何人不得获取这些信息。
- 本知情同意书一式两份，受试者和研究者各一份，双方签字后有效。

### 受试者的知情同意：

我已详细阅读并充分了解以上内容，并对以上内容，特别是我参与此研究的权利、风险和受益进行了认真考虑。我自愿参加这项研究，愿意与研究人员合作。同时声明我可以在任何时候因任何原因退出此研究，而不会丧失任何合法权利。

受试者姓名：\_\_\_\_\_ 受试者签字：\_\_\_\_\_ 日期：\_\_\_\_\_年\_\_\_\_月\_\_\_\_日

研究者姓名：\_\_\_\_\_ 研究者签字：\_\_\_\_\_ 日期：\_\_\_\_\_年\_\_\_\_月\_\_\_\_日

# BMJ Open

## Perioperative Patient-Controlled Regional Analgesia versus Patient-Controlled Intravenous Analgesia for Patients with Critical Limb Ischemia: A Study Protocol for a Randomized Controlled Trial

|                                 |                                                                                                                                                                                                                                                                                                                                                                                                                                                                                                                                                                                                                                                                                                       |
|---------------------------------|-------------------------------------------------------------------------------------------------------------------------------------------------------------------------------------------------------------------------------------------------------------------------------------------------------------------------------------------------------------------------------------------------------------------------------------------------------------------------------------------------------------------------------------------------------------------------------------------------------------------------------------------------------------------------------------------------------|
| Journal:                        | <i>BMJ Open</i>                                                                                                                                                                                                                                                                                                                                                                                                                                                                                                                                                                                                                                                                                       |
| Manuscript ID                   | bmjopen-2020-037879.R1                                                                                                                                                                                                                                                                                                                                                                                                                                                                                                                                                                                                                                                                                |
| Article Type:                   | Protocol                                                                                                                                                                                                                                                                                                                                                                                                                                                                                                                                                                                                                                                                                              |
| Date Submitted by the Author:   | 23-Jun-2020                                                                                                                                                                                                                                                                                                                                                                                                                                                                                                                                                                                                                                                                                           |
| Complete List of Authors:       | Chen, Si; Peking Union Medical College Hospital, Department of Anesthesiology<br>Xu, Zhonghuang; Peking Union Medical College Hospital, Department of Anesthesiology<br>Liu, Hongju; Peking Union Medical College Hospital, Department of Anesthesiology<br>Zhang, Yuelun; Peking Union Medical College Hospital, Medical Research Center<br>Zhang, Jiao; Peking Union Medical College Hospital, Department of Anesthesiology<br>Chen, Yuexin; Peking Union Medical College Hospital, Department of Vascular surgery<br>Zheng, Yuehong ; Peking Union Medical College Hospital, Department of Vascular surgery<br>Huang, Yuguang; Peking Union Medical College Hospital, Department of Anesthesiology |
| <b>Primary Subject Heading</b>: | Surgery                                                                                                                                                                                                                                                                                                                                                                                                                                                                                                                                                                                                                                                                                               |
| Secondary Subject Heading:      | Anaesthesia, Surgery                                                                                                                                                                                                                                                                                                                                                                                                                                                                                                                                                                                                                                                                                  |
| Keywords:                       | Vascular surgery < SURGERY, PAIN MANAGEMENT, Pain management < ANAESTHETICS                                                                                                                                                                                                                                                                                                                                                                                                                                                                                                                                                                                                                           |
|                                 |                                                                                                                                                                                                                                                                                                                                                                                                                                                                                                                                                                                                                                                                                                       |

SCHOLARONE™  
Manuscripts



I, the Submitting Author has the right to grant and does grant on behalf of all authors of the Work (as defined in the below author licence), an exclusive licence and/or a non-exclusive licence for contributions from authors who are: i) UK Crown employees; ii) where BMJ has agreed a CC-BY licence shall apply, and/or iii) in accordance with the terms applicable for US Federal Government officers or employees acting as part of their official duties; on a worldwide, perpetual, irrevocable, royalty-free basis to BMJ Publishing Group Ltd ("BMJ") its licensees and where the relevant Journal is co-owned by BMJ to the co-owners of the Journal, to publish the Work in this journal and any other BMJ products and to exploit all rights, as set out in our [licence](#).

The Submitting Author accepts and understands that any supply made under these terms is made by BMJ to the Submitting Author unless you are acting as an employee on behalf of your employer or a postgraduate student of an affiliated institution which is paying any applicable article publishing charge ("APC") for Open Access articles. Where the Submitting Author wishes to make the Work available on an Open Access basis (and intends to pay the relevant APC), the terms of reuse of such Open Access shall be governed by a Creative Commons licence – details of these licences and which [Creative Commons](#) licence will apply to this Work are set out in our licence referred to above.

Other than as permitted in any relevant BMJ Author's Self Archiving Policies, I confirm this Work has not been accepted for publication elsewhere, is not being considered for publication elsewhere and does not duplicate material already published. I confirm all authors consent to publication of this Work and authorise the granting of this licence.

1  
2  
3  
4 Perioperative Patient-Controlled Regional Analgesia versus  
5  
6  
7 Patient-Controlled Intravenous Analgesia for Patients  
8  
9  
10 with Critical Limb Ischemia: A Study Protocol for a  
11  
12 Randomized Controlled Trial  
13  
14  
15

16 Si Chen<sup>1</sup>, Zhonghuang Xu<sup>1</sup>, Hongju Liu<sup>1</sup>, Yuelun Zhang<sup>2</sup>, Jiao Zhang<sup>1</sup>, Yuexin Chen<sup>3</sup>,  
17  
18 Yuehong Zheng<sup>3\*</sup>, Yuguang Huang<sup>1</sup>  
19  
20  
21  
22  
23

24 \*Correspondence: yuehongzheng@yahoo.com  
25  
26

27 Si Chen And Zhonghuang Xu are joint first authors.  
28  
29

30 1 Department of Anesthesiology, Peking Union Medical College Hospital, Chinese Academy of  
31  
32 Medical Science & Peking Union Medical College, Beijing, 100730, China.  
33  
34

35 2 Medical Research Center, Peking Union Medical College Hospital, Chinese Academy of  
36  
37 Medical Science & Peking Union Medical College, Beijing, 100730, China.  
38  
39

40 3 Department of Vascular surgery, Peking Union Medical College Hospital, Chinese Academy of  
41  
42 Medical Science & Peking Union Medical College, Beijing, 100730, China.  
43  
44  
45  
46  
47  
48

49 Word count: 3605  
50  
51  
52  
53  
54  
55  
56  
57  
58  
59  
60

**Abstract:**

Introduction: Both regional analgesia and intravenous analgesia are frequently used perioperatively for patients with critical limb ischemia (CLI). Nevertheless, the comparison of perioperative effect of regional and intravenous analgesia has not yet been thoroughly illustrated. This study will comprehensively compare patient-controlled regional analgesia (PCRA) and patient-controlled intravenous analgesia (PCIA) as two different perioperative analgesia approaches for patients with CLI. It investigates their effects on analgesia, reperfusion and the quality of recovery perioperatively, also aims to provide clinical evidence to those non-surgical patients with non-reconstructable arteries.

Methods and analysis: This trial is a randomized, single-centre, open-label, parallel trial with target sample size of 78 in total. Eligible participants will be randomly allocated to the PCRA group (group R) or the PCIA group (group I) after admission. Participants in group R will receive ultrasound-guided subgluteal sciatic catheterization, followed by continuous patient-controlled regional analgesia infusion (0.2% ropivacaine 15ml as loading dose, 8ml/h as background with a patient-controlled bolus of 6ml). Participants in group I will receive patient-controlled intravenous analgesia (morphine is given in boluses of 1mg as needed, background infusion at 1mg/h). Data will be collected at baseline (T0), two hours before revascularization treatment (T1) and two hours before discharge (T2). The primary outcomes include the numerical rating scale (NRS) pain score at T1 and T2. The secondary outcomes include the perioperative

1  
2  
3  
4 transcutaneous oxygen pressure (TcPO<sub>2</sub>), the tissue hemoglobin index (TOI), Hospital  
5  
6  
7 Anxiety and Depression Scale (HADS) at T1 and T2; the Patient Global Impression of  
8  
9  
10 Change (PGIC) and patient satisfaction at T1 and T2; the perioperative cumulative  
11  
12 morphine consumption, the length of postoperative hospital stay and adverse events  
13  
14  
15 (AEs).

16  
17  
18 Ethics and dissemination: This study received authorization from the Institutional  
19  
20  
21 Review Board of Peking Union Medical College Hospital on 21 March 2017 (approval  
22  
23 no. ZS-1289X). Study findings will be disseminated through presentations at scientific  
24  
25  
26 conferences or publications in peer-reviewed journals.

27  
28  
29  
30  
31 Trial registration: Registered on 22 January 2020. Chinese Clinical Trial Registry,  
32  
33  
34 identifier ChiCTR2000029298.

35  
36  
37 Protocol version: V4CP.B2 (15, June, 2020)

38  
39  
40  
41  
42 Strengths and limitations of this study:

- 43  
44  
45 ● Aiming to compare the perioperative efficacy of two different analgesia  
46  
47 approaches, this study will assess their effects on analgesia, reperfusion, as well as  
48  
49 the quality of recovery, rather than their effects on analgesia alone.  
50  
51  
52 ● Patient-controlled analgesia is used in this study so that the perioperative pain  
53  
54 management for patients with CLI could be individual and continuous. The  
55  
56 analgesia approaches cover the perioperative period thoroughly.  
57  
58  
59  
60

- Two different-principle-based measuring parameters are used to evaluate the reperfusion effect. TcPO<sub>2</sub> is by heating skin to a stable hyperemia equilibrium condition, TOI is by detecting the absorption and reflection of near-infrared light.
- As an open-labeled trial, all participants and some of the investigators are aware of group assignment, their expectation may introduce bias.

**Keywords:** critical limb ischemia, patient-controlled analgesia, perfusion, analgesia

## Introduction

Critical limb ischemia (CLI) presents the end stage of peripheral arterial disease (PAD)

<sup>1</sup>. CLI is clinically defined as ischemic rest pain, ulcers and gangrene in the presence of hemodynamic evidence of arterial insufficiency<sup>2</sup>. The mean annual incidence of CLI was 0.35% reported in a national investigation from the United States<sup>3</sup>. The prevalence is approximately 1% of the adult population, and up to 10% of patients with PAD may have CLI. In recent years, a consensus from Peripheral Academic Research Consortium has provided an objective hemodynamic definition for CLI<sup>4</sup>. In this study, this consensus definition will also be used to diagnose CLI.

The major goal of CLI treatment is to relieve ischemic pain, improve limb perfusion, heal wounds and prevent further tissue loss<sup>5</sup>. The Inter-Society Consensus for the Management of Peripheral Arterial Disease (TASC II) emphasized the importance of the pain management for CLI patients and recommended a multidisciplinary approach to control pain<sup>1</sup>. Pain control is important not only to improve quality of life, but also reduce the possibility of phantom limb pain<sup>6-7</sup>. For patients with PAD, the general principles of perioperative pain management should be individual, continuous and cover the whole perioperative period thoroughly<sup>8</sup>. Over the past years, the patient-controlled analgesia has become the mainstay for providing postoperative pain relief<sup>9</sup>. Accordingly, we considered to establish patient-controlled analgesia preoperatively in our study. Existing studies suggested that intravenous morphine<sup>10</sup> and ultrasound-guided peripheral nerve block provided satisfactory analgesia effect on patients with



1  
2  
3  
4 CLI<sup>11-14</sup>. However, the analgesia effect of intravenous morphine and ultrasound-guided  
5  
6 regional block has not been compared before. Therefore, in this study, we plan to  
7  
8 compare the perioperative analgesia effect of patient-controlled regional analgesia  
9  
10 (PCRA) and patient-controlled intravenous analgesia (PCIA) for patients diagnosed  
11  
12 with CLI.  
13  
14  
15

16  
17 Additionally, few of the previous studies have studied the effects on reperfusion besides  
18  
19 analgesia. A previous prospective study showed that continuous peridural ropivacaine  
20  
21 infusion provided satisfactory analgesia, dilated vessels, reconstructed collateral  
22  
23 circulation and improved reperfusion remarkably in diabetic patients<sup>15</sup>. Regional  
24  
25 analgesia can cause changes in vascular blood flow, but data regards to CLI patients'  
26  
27 perioperative experiences is limited. Therefore, in this study, the reperfusion effect of  
28  
29 the PCRA and PCIA methods will be further evaluated within participants with CLI.  
30  
31 To compare the effect on reperfusion between the two analgesia approaches, we plan  
32  
33 to use two different-principle-based measuring parameters, namely, the perioperative  
34  
35 transcutaneous oxygen pressure (TcPO<sub>2</sub>) and the tissue hemoglobin index (TOI).  
36  
37 TcPO<sub>2</sub> is a transcutaneous, conventional clinical parameter measured heating a skin  
38  
39 tissue in the range of 37°C to 45°C to reach a stable hyperemia equilibrium condition<sup>16</sup>.  
40  
41 NIRS detects the absorption and reflection of near-infrared light and has the potential  
42  
43 to provide continuous, real-time measurement of both blood volume and cellular  
44  
45 respiration in skin tissue. Other perioperative data regarding the quality of recovery,  
46  
47 such as the patients' emotional state, global impression of change, patient satisfaction,  
48  
49  
50  
51  
52  
53  
54  
55  
56  
57  
58  
59  
60

1  
2  
3  
4 perioperative morphine consumption, length of postoperative hospital stay and adverse  
5  
6  
7 events (AEs) will be investigated as well.  
8  
9  
10

## 11 Objective

12  
13  
14  
15 The objectives of this randomized controlled trial are to compare the perioperative  
16  
17 analgesia efficacy between PCRA and PCIA for patients with CLI. The perioperative  
18  
19 effect on peripheral inflow perfusion, emotion, patient global impression of change  
20  
21 (PGIC), patient satisfaction, morphine consumption, length of postoperative hospital  
22  
23 stay and AEs of PCRA and PCIA will also be evaluated and compared.  
24  
25  
26  
27  
28  
29  
30

## 31 Methods and analysis

### 32 Overall design

33  
34  
35 This trial is a randomized, single-centre, open-label, parallel trial, and will be carried  
36  
37 out in Peking Union Medical College Hospital (PUMCH). Institutional research ethics  
38  
39 board approval was obtained from PUMCH Institutional Review Board (No. ZS-1289X,  
40  
41 21 March 2017). An overall flow diagram is provided in Fig.1. The timing of  
42  
43 interventions and data collection is detailed in Fig 2. This protocol was designed in  
44  
45 accordance with the Standard Protocol Items: Recommendations for Interventional  
46  
47 Trials (SPIRIT) guidelines<sup>17</sup>, the checklist can be found in Appendix 1. The trial will  
48  
49  
50  
51  
52  
53  
54  
55  
56  
57  
58  
59  
60 be conducted at PUMCH in accordance with the Good Clinical Practice- International

1  
2  
3  
4 Conference on Harmonisation (GCP-ICH) guidelines. This trial was registered with the  
5  
6 Chinese Clinical Trial Registry (ChiCTR2000029298).  
7  
8  
9

## 10 11 12 Recruitment

13  
14 Recruitment for this study will begin on 27 July 2020. Full written informed consents  
15  
16 will be obtained from each participant by a qualified member of the research team prior  
17  
18 to any trial-related procedures.  
19  
20  
21  
22  
23  
24

## 25 26 Inclusion criteria

27  
28 Participants who meets the following criteria will be enrolled in this trial:  
29  
30

- 31 ● 18~80 years of age
- 32
- 33 ● Diagnosed with critical limb ischemia<sup>2 4</sup>, admitted in hospital for elective surgery
- 34
- 35 treatment, either open surgical or endovascular revascularization
- 36
- 37
- 38 ● The lesions are mainly unilateral and in the supplied area of sciatic nerve
- 39
- 40 ● Stage 6 in Rutherford symptom classification system<sup>18</sup>
- 41
- 42
- 43 ● American Society of Anesthesiology (ASA) physical status II~III
- 44
- 45
- 46
- 47
- 48
- 49

## 50 51 Exclusion criteria

52  
53 Participants who meets the following criteria will be excluded:  
54

- 55 ● Are taking opioids before admission
- 56
- 57 ● Have known allergy to the drugs will be used in the study
- 58
- 59
- 60

- Have severe liver or kidney dysfunction
- Have contraindication for the catheterization (e.g. infection at injection site, coagulation disorders, refuse or be unable to cooperate the procedure)
- The dorsum of the affected foot is not intact
- Are unable to understand the scales or to describe to the investigators

#### Dropout criteria

Participants who meets the following criteria will be withdrawn from the study:

- Not willing to continue their participation or cannot follow the initial treatment plan
- From whom none of the primary outcome data can be obtained due to any reason

#### Randomization, sequence concealment and blinding

All eligible participants will be randomly allocated to either group R or the group I in a ratio of 1:1 using the R software (R Foundation for Statistical Computing). The random allocation sequence will be computer-generated by an independent researcher who has no contact with any participant and will not be involved in the following research. The participants' respective treatment group (group R or group I) will be sealed in an opaque envelope and will only be opened after the enrolment of the participants in the study. An investigator will be responsible for enrolling patients, obtaining consent form and requesting randomization.

1  
2  
3  
4 This study is an open-label study whereby the participants, the personnel who carry out  
5  
6 the intervention and the outcome assessor cannot be blinded because of the nature of  
7  
8 the intervention. However, the researchers who are responsible for the statistical  
9  
10 analysis will be blinded to the allocation.  
11  
12  
13  
14  
15  
16

### 17 Interventions

18  
19  
20 Analgesia approaches will be established after the baseline assessment (T0) and  
21  
22 randomization, normally three to five days before the revascularization treatment. The  
23  
24 FORNIA CPE-101 electronic infusion pump will be used as the continuous patient-  
25  
26 controlled analgesia device. Relevant concomitant intervention is not involved in this  
27  
28 study. Analgesics outside the intervention plan are prohibited during the trial. Remedial  
29  
30 analgesia therapy will be carried out according to clinical needs for participants who  
31  
32 are dropped out from the trial.  
33  
34  
35  
36  
37  
38

### 39 The PCRA group (group R)

40  
41  
42 Ultrasound-guided continuous subgluteal sciatic block will be applied on the  
43  
44 participants enrolled in the group R. Patient will be placed partly lateral and partly  
45  
46 prone, with the legs flexed in the hip and knee. Scanning begins in the depression  
47  
48 between the greater trochanter of femur and the ischial tuberosity using the 8-3MHz  
49  
50 curved probe of the ultrasound equipment (X-porte, SONOSITE, USA). The sciatic  
51  
52 nerve can be identified in the cross-sectional view in between of the two bones, below  
53  
54 the gluteus muscle. Then rotate the transducer 90° so that the sciatic nerve is imaged in  
55  
56  
57  
58  
59  
60

1  
2  
3  
4 the longitudinal view. Insert needle in-plane from the cranial to caudal direction and  
5  
6  
7 underneath the fascia to enter the subgluteal space, then advance the needle until the tip  
8  
9 is adjacent to the nerve. After confirming the needle placement by obtaining a motor  
10  
11 response of the calf and foot using the peripheral nerve stimulator, inject 0.2%  
12  
13 ropivacaine 15ml for loading dose, then insert the catheter 5cm beyond the needle tip  
14  
15 in vicinity of the sciatic nerve. Finally, secure the catheter by tunneling and taping. The  
16  
17 infusion strategy includes 0.2% ropivacaine at 8ml/h as background with a patient-  
18  
19 controlled bolus of 6ml, lockout time 30min, 1-h limit 20ml.  
20  
21  
22  
23  
24

25  
26 The PCIA group (group I)

27  
28 For the participants enrolled in the group I, patient-controlled intravenous analgesia  
29  
30 will be connected after intravenous access is established. The infusion strategy is as  
31  
32 follow. Intravenous morphine is given in boluses of 1mg as needed, background  
33  
34 infusion 1mg/h, with a lockout time of 20min. The 1-h limit is 4mg morphine.  
35  
36  
37  
38

39 The intraoperative and postoperative patient management

40  
41  
42 The continuous patient-controlled analgesia will not be suspended during the  
43  
44 revascularization treatment despite the type of anaesthesia method. After the  
45  
46 revascularization, the device will be paused when patient report it is no longer needed,  
47  
48 which usually takes several days. The device will be on standby for an additional 48  
49  
50 hours before removal. In case of inadequate analgesia is provided perioperatively, the  
51  
52 infusion strategy dosage may be increased for patients in group I, extra-doses of  
53  
54  
55  
56  
57  
58  
59  
60

1  
2  
3  
4 intravenous morphine may be used and recorded for patients in group R. Ancillary and  
5  
6  
7 post care will not be involved in this study.  
8  
9  
10

## 11 Outcomes

### 12 *Primary outcomes*

13  
14  
15  
16  
17 The primary outcome of this trial is the numerical rating scale (NRS). NRS allows  
18 patients to describe the intensity of pain, which is 11-point scale ranging from 0 to 10,  
19  
20  
21  
22  
23 with 0 defined as no pain and 10 defined as the worst pain imaginable<sup>19</sup>. The  
24  
25  
26 measurement timepoint of the primary outcome will be two hours before  
27  
28  
29 revascularization treatment (T1) and two hours before discharge (T2).  
30

### 31 *Secondary outcomes*

32  
33  
34 The secondary outcomes are as follows:

- 35  
36  
37 ● The transcutaneous oxygen pressure (TcPO<sub>2</sub>) at T1 and T2. TcPO<sub>2</sub> will be obtained  
38  
39 with PeriFlux System 5000 (PERIMED, Sweden) transcutaneously using the  
40  
41 TcPO<sub>2</sub> unit-PF 5040. Calibration will be completed before use. When measuring,  
42  
43 patients will be in sitting position. The electrode of the PF 5040 will be placed on  
44  
45 the dorsum of the affected foot, away from any skin lesion. Wait 10~15min for a  
46  
47  
48 stable reading.  
49  
50
- 51  
52  
53 ● The tissue hemoglobin index (TOI) at T1 and T2. TOI will be obtained with the  
54  
55 EGOS-600A near infrared spectroscopy (NIRS, ENGINMED, China). The  
56  
57  
58 transducer of NIRS will be placed at the same spot as PF5040 on a sitting position,  
59  
60

1  
2  
3  
4 after the completion of TcPO<sub>2</sub> measurement. Wait 30 sec for each interval to gain  
5  
6 five readings. The values at each time point will be calculated as the mean of five  
7  
8 consecutive values over 2min.  
9  
10

- 11 ● Hospital Anxiety and Depression Scale (HADS) at T1 and T2. HADS is a self-  
12 rating patient-reported outcome measure developed to assess depression and  
13 anxiety of patients with illness. The 24-item questionnaire is divided into two  
14 subscales: anxiety (HADS-A) and depression (HADS-D). The ratings are summed  
15 to yield a total score (0 to 42), or for each subscale (0 to 21) with special attention<sup>20</sup>.  
16  
17
- 18 ● Patient Global Impression of Change (PGIC) at T1 and T2. PGIC is a 7-point verbal  
19 scale commonly used to assess patient's perception of pain relief following  
20 treatment, which has been proved its significant relevance and correlations for  
21 peripheral neuropathic pain in daily practice<sup>21</sup>.  
22  
23
- 24 ● Patient satisfaction at T1 and T2. This item allows patients to describe their  
25 satisfaction in medical procedures according to the experience in hospital using a  
26 11-point scale from 0 to 10, with 0 defined as extremely dissatisfied and 10 defined  
27 as vastly satisfied.  
28  
29
- 30 ● Cumulative morphine consumption perioperatively, the sum will be calculated  
31 before discharge.  
32  
33
- 34 ● Length of postoperative hospital stay.  
35  
36
- 37 ● AEs, such as hematoma, catheter displacement, nausea, vomiting, drowsiness,  
38 dizziness, urinary retention, pruritus, local anaesthesia intoxication, fall, etc. The  
39  
40  
41  
42  
43  
44  
45  
46  
47  
48  
49  
50  
51  
52  
53  
54  
55  
56  
57  
58  
59  
60



1  
2  
3  
4 occurrence time, nature, duration and severity of AEs will all be collected in detail.  
5  
6  
7  
8

### 9 Trial safety

10  
11 The establishment, configuration and dispensing of the patient-controlled analgesia  
12 devices will be completed by a dependable anesthesiologist. The continuous  
13  
14 ultrasound-guided subgluteal sciatic block will be performed in an operating room, only  
15  
16 after intravenous access and standard monitoring is established for the patient.  
17  
18 Investigators will follow up the patient at least twice a day during the research. Motor  
19  
20 block will be assessed everyday using Bromage motor blockage score<sup>22</sup> in group R to  
21  
22 prevent falling. All the reported AEs and other unintended effects of trial conduct will  
23  
24 be collected, assessed, reported and managed according to the GCP-ICH guidelines.  
25  
26 Any severe AE happens perioperatively will be reported to the adverse event  
27  
28 registration system of the hospital.  
29  
30  
31  
32  
33  
34  
35  
36  
37  
38  
39  
40  
41

### 42 Patient and public involvement

43  
44 Patients and public were not involved in the development of the research question or in  
45  
46 the design of the study. Patients will receive oral and written information about this  
47  
48 trial. However, they will not be involved in the recruitment and conduct of the study.  
49  
50  
51 The burden of the intervention will be assessed by patients themselves. On completion  
52  
53 of the study, dissemination of the general study results or the anonymized individual  
54  
55 patient data will be made on demand.  
56  
57  
58  
59  
60

## Sample size

The primary outcome of this trial is the NRS score after analgesia. Sample size was calculated based on our pilot study which had included ten patients in total (five for each group). The result of the pilot study showed that the NRS scores in group R and group I was 1.63 and 3.31, and the standard deviation was 1.85 and 2.12 respectively. We used the statistical power of 80% and two-sided  $\alpha$  of 0.05. The target sample size for each group is at least 22 participants. Taking into account a dropout rate of 20%, a sample size of 52 (26 for each group) was finally determined.

## Data collection, monitoring and confidentiality

Each patient's ID and demographic information (including age, gender, height, weight) will be collected. We will document all the AEs related to PCRA or PCIA, including hematoma, catheter displacement, local anaesthesia intoxication, nausea, dizziness, urinary retention, pruritus, fall, etc. All the calibration and measurements of TcPO<sub>2</sub> and TOI will be performed and recorded by one special technician using the same apparatuses. Participant retention and follow-up engagement is enhanced by communicate verbally and via common instant message app. In the case where primary outcome data is missing at T2, investigators will call the participants within two days of discharge to collect the missing data. Collected data will be recorded on paper case report forms (CRFs), then entered into electronic case report forms (eCRFs) and

1  
2  
3  
4 uploaded to a central server. The CRFs and eCRFs will be kept for at least five years  
5  
6 after publication in case of any inquiry. A qualified clinical trial expert will be invited  
7  
8 in the middle and at the end of the investigation to ensure that the protocol and GCP-  
9  
10 ICH are being followed. No interim analysis will be performed during the study. There  
11  
12 is no planned auditing for the study. Personal information about the enrolled  
13  
14 participants will be safely and confidentially kept. After completion of the study, the  
15  
16 eCRFs and all the data collected will be stored anonymously in the password-protected  
17  
18 central server and restricted to relevant members of the research team. Paper copies of  
19  
20 the CRFs will be stored in a locked cabinet in the relevant research office.  
21  
22  
23  
24  
25  
26  
27  
28  
29  
30

### 31 Statistical analyses

32  
33 Continuous variables will firstly be checked for normality using the visual inspection  
34  
35 of the histogram. Normally distributed continuous variables will be expressed as the  
36  
37 mean  $\pm$  SD, and non-normally distributed continuous variables will be expressed as the  
38  
39 median and interquartile range (IQR). The categorical variables will be summarized as  
40  
41 frequencies and percentages. Variables such as anaesthesia method and surgery type  
42  
43 will be checked in the description of baseline characteristics, unbalanced variables will  
44  
45 be adjusted using a multivariable method. The primary outcome, difference of NRS  
46  
47 between groups, which is generally normally distributed from experience, will be  
48  
49 analyzed using student's *t* test, and the mean difference with corresponding one-sided  
50  
51 95% confidence interval (CI) will be calculated. For the secondary outcomes including  
52  
53  
54  
55  
56  
57  
58  
59  
60

1  
2  
3  
4 TcPO<sub>2</sub>, TOI, HADs and PGIC, student's *t* test will be used to compare the group  
5  
6 difference. Data with a skewed distribution, such as cumulative morphine consumption  
7  
8 and length of postoperative hospital stay, will be analyzed using the Mann-Whitney U  
9  
10 test. As categorical variables, AEs will be compared using chi-squared test. A post-hoc  
11  
12 subgroup analysis by the type of revascularization treatment (whether endovascular or  
13  
14 open surgical) will be conducted. The main analysis will be performed after the study  
15  
16 has been completed. Data analysis will be performed according to the intention to treat  
17  
18 principle. The results of this study will be reported according to the Consolidated  
19  
20 Standards of Reporting Trials (CONSORT) statement<sup>23</sup>. Statistical analyses will be  
21  
22 conducted using SPSS 19.0 (Version 22; SPSS Inc., Chicago, IL, USA). A two-sided  
23  
24  $p < 0.05$  is considered significant.  
25  
26  
27  
28  
29  
30  
31  
32  
33  
34  
35

### 36 Ethics and dissemination

#### 37 Ethics approval and consent to participate

38  
39 This research project was approved by the Peking Union Medical College Hospital  
40  
41 Institutional Review Board (ZS-1289X) on 21 March 2017. Important protocol  
42  
43 amendments will be communicated with relevant parties (eg, investigators, IRB, trial  
44  
45 participants, trial registries, journals) by Dr. Yuehong Zheng, trial principal investigator,  
46  
47 as soon as changes are made. Written informed consent (details see Appendix 2) will  
48  
49  
50  
51  
52  
53  
54  
55  
56  
57  
58  
59  
60 be obtained from all participants.

## Trial Organization

### Steering Committee

The Steering Committee carries the ultimate responsibility for the trial and has access to the final dataset. Specific tasks of the Steering Committee are: final approval of the study protocol, approval of the amendments to the study protocol, approval of manuscripts and publications of the trial. The Steering Committee is chaired by Yuehong Zheng, vascular surgery surgeon. Other members include Si Chen, anaesthesiologist and Yuelun Zhang, statistician.

### Data and Safety Monitoring Committee (DSMC)

The DSMC is established to assess the progress of the study, the safety of data and the critical efficacy end points independently from the sponsor and competing interests. Wellbeing of the participants will be monitored by the DSMC, who makes decision on the suspension or termination of the trial to protect the participants under circumstances of severe or unexpected AEs. The DSMC is chaired by Yuguang Huang, Anaesthesiologist. Other members include Hongju Liu, anaesthesiologist and Yuexin Chen, vascular surgery surgeon.

### Trial status and time scale

The study was funded and ethically approved in 2017. A pilot study was conducted subsequently. We had finished the pilot study by 8 July 2018, then the study was

1  
2  
3  
4 delayed because of the maternity leave of Si Chen until January 2020. The trial was  
5  
6 registered on 22 January 2020 and will begin to recruit participants on 27 July 2020.  
7  
8  
9

## 10 11 12 Dissemination plan

13  
14  
15 The result of this study will be presented in national and international meetings and will  
16  
17 be submitted for publication to relevant vascular surgery, analgesia or anaesthesia peer-  
18  
19 reviewed journals. Authorship eligibility will follow the Good Publication Practice  
20  
21 (GPP) guideline 3.  
22  
23  
24  
25  
26  
27

## 28 29 Discussion

30  
31 The purpose of this study is to compare the analgesia effect of PCRA and PCIA. The  
32  
33 effects on reperfusion and quality of recovery are meanwhile investigated in patients  
34  
35 diagnosed with CLI.  
36  
37

38  
39 In this study, a low concentration ropivacaine of 0.2% will be used for patients in group  
40  
41 R, and a low to median dosage of intravenous morphine will be used for patients of  
42  
43 group I. Morphine is a strong opioid which is well known for its supreme analgesia and  
44  
45 adverse effects such as nausea, vomiting, drowsiness, itching etc. Ropivacaine is a long-  
46  
47 acting regional anesthetic that blocks nerve fibers involved in pain transmission to a  
48  
49 greater degree than those controlling motor functions<sup>24</sup>.  
50  
51  
52

53  
54  
55 Regional analgesia can cause changes in vascular blood flow, but data regards to CLI  
56  
57 patients' perioperative experiences is limited. In this study, we plan to perform two  
58  
59  
60

1  
2  
3  
4 different measuring methods to observe the effects on reperfusion of PCRA and PCIA.

5  
6  
7 In previous researches, the parameter TOI was also known as the region tissue  
8  
9 oxygenation saturation (rSO<sub>2</sub>). A recent study has revealed a significant correlation  
10  
11 between TcPO<sub>2</sub> and rSO<sub>2</sub> measured by NIRS to evaluate limb ischemia in patients with  
12  
13 peripheral arterial disease<sup>25</sup>. We expect the outcomes of this study provide clinical  
14  
15 evidence for the efficacy of the two different analgesia approaches perioperatively.  
16  
17

18  
19  
20 We also hope this study offers a reference for the non-surgical patients. Although  
21  
22 revascularization has been the most effective treatment for patients with CLI, some  
23  
24 patients' arteries are impossible to revascularize and require other treatments such as  
25  
26 drugs<sup>26</sup>, transcutaneous electrical stimulation<sup>27</sup>, peripheral blood mononuclear cells  
27  
28 therapy<sup>28</sup> or lumbar sympathectomy<sup>29</sup> to relieve pain and/or increase peripheral  
29  
30 perfusion to avoid amputation. For those patients with non-reconstructable arteries,  
31  
32 long-term PCRA may be less invasive and adequate for both analgesia and perfusion.  
33  
34 There are evidences showing that it is safe to discharge patient home with catheter<sup>30</sup>. In  
35  
36 addition, it has been previously reported that continuous sciatic nerve block could be  
37  
38 used at home for long-term pain control<sup>31</sup>. We expect this perioperative study can also  
39  
40  
41  
42  
43  
44  
45  
46  
47  
48  
49  
50  
51  
52  
53  
54  
55  
56  
57  
58  
59  
60  
improve their quality of life.

## Abbreviations

1  
2  
3  
4 PAD, peripheral artery disease; CLI, critical limb ischemia; PCRA, patient-controlled  
5  
6 regional analgesia; PCIA, patient-controlled intravenous analgesia; TcPO<sub>2</sub>,  
7  
8 transcutaneous oxygen pressure; TOI, tissue hemoglobin index; AE, adverse events;  
9  
10 PUMCH, Peking Union Medical College Hospital; SPIRIT: Standard Protocol Items:  
11  
12 Recommendations for Interventional Trials; GCPs, Good Clinical Practice; ICH,  
13  
14 International Conference on Harmonisation; ASA, American Society of  
15  
16 Anesthesiology; NIRS, near infrared spectroscopy; NRS, numerical rating scale; HAD,  
17  
18 Hospital Anxiety and Depression Scale; PGIC, Patient Global Impression of Change;  
19  
20 VAS, visual analogue scale; CRFs, case report forms, CONSORT, Consolidated  
21  
22 Standards of Reporting Trials; rSO<sub>2</sub>, region tissue oxygenation saturation; DSMC, Data  
23  
24 and Safety Monitoring Committee; GPP, Good Publication Practice.  
25  
26  
27  
28  
29  
30  
31  
32  
33  
34  
35  
36  
37

### 38 Acknowledgements

39 We acknowledge Chinese Anesthesiologist Association for funding this study. We  
40  
41 would also like to thank Dujian Wang for her valuable effort on the investigation.  
42  
43  
44  
45  
46  
47

### 48 Funding

49 This work was supported by Young Scholar Research Grant of Chinese  
50  
51 Anesthesiologist Association (220160900007). Contact information: +86-0717-  
52  
53 6345093, [mail@ycrfu.com.cn](mailto:mail@ycrfu.com.cn). The funders will not participate in the study design  
54  
55  
56  
57  
58  
59  
60



1  
2  
3  
4 and management; data collection, analysis and interpretation; report writing; or  
5  
6  
7 publication.

#### 11 12 Authors' contributions

13  
14 SC and ZHX are joint first authors. SC obtained funding and the ethical approval,  
15  
16 registered and drafted the manuscript. ZHX and YHZ conceived the study and  
17  
18 participated in the design of the study. YGH, HJL and YXC participated in the study  
19  
20 coordination. YLZ contributed to the statistical analysis plan. JZ acquired and analyzed  
21  
22 the data of the work. YHZ is the corresponding author. He critically edited the  
23  
24 manuscript. All authors read and approved the final manuscript and agreed the  
25  
26 submission.  
27  
28  
29  
30  
31  
32  
33  
34  
35  
36

#### 37 38 Competing interests

39  
40 All authors have completed the ICMJE uniform disclosure form at  
41  
42 [http://www.icmje.org/coi\\_disclosure.pdf](http://www.icmje.org/coi_disclosure.pdf) and declare: no financial relationships with  
43  
44 any organization that might have an interest in the submitted work in the previous three  
45  
46 years, no other relationships of activities that could appear to have influenced the  
47  
48 submitted work. There is no conflict of interests.  
49  
50  
51  
52  
53  
54

#### 55 56 Data sharing

57  
58 No additional data are available.  
59  
60

## References

1. Norgren L, Hiatt WR, Dormandy JA, *et al.* Inter-society consensus for the management of peripheral arterial disease (TASC II). *J Vasc Surg* 2007;45(suppl S):S5-S67.
2. Fontaine R, Kim M, Kieny R. Surgical treatment of peripheral circulation disorders. *Helv Chim Acta* 1954;21(5-6):499-533.
3. Nehler MR, Duval S, Diao L, *et al.* Epidemiology of peripheral arterial disease and critical limb ischemia in an insured national population. *J Vasc Surg* 2014;60(3):686-95.e2.
4. Patel MR, Conte MS, Cutlip DE, *et al.* Evaluation and treatment of patients with lower extremity peripheral artery disease: consensus definitions from Peripheral Academic Research Consortium (PARC). *J Am Coll Cardiol* 2015;65(9):931-941.
5. Farber A, Eberhardt RT. The Current State of Critical Limb Ischemia: A Systematic Review. *JAMA Surg* 2016;151(11):1070-1077.
6. Collins TC, Beyth RJ, Nelson DB, *et al.* Process of care and outcomes in patients with peripheral arterial disease. *J Gen Intern Med* 2007;22(7):942-948.
7. Wu CL, Tella P, Staats PS, *et al.* Analgesic effects of intravenous lidocaine and morphine on postamputation pain: a randomized double-blind, active placebo-controlled, crossover trial. *Anesthesiology* 2002;96(4):841-848.
8. Bloomquist T. Amputation and phantom limb pain: a pain-prevention model. *AANA J* 2001;69(3):211-217.
9. Taylor A, Stanbury L. A review of postoperative pain management and the challenges. *Curr Opin Anaesthesiol* 2009;20(4):188-194.
10. Vahidi E, Shakoor D, Aghaie Meybodi M, *et al.* Comparison of intravenous lidocaine versus morphine in alleviating pain in patients with critical limb ischaemia. *Emerg Med J* 2015;32(7):516-519
11. Azuma N, Kikuchi S, Okuda H, *et al.* Recent Progress of Bypass Surgery to the Dialysis-Dependent Patients with Critical Limb Ischemia. *Ann Vasc Dis* 2017;10(3):178-184.
12. Tureli D, Deniz S, Unlukaplan A, *et al.* Ultrasound-Guided Popliteal Sciatic Block Provides Adequate Analgesia During Urgent Endovascular Treatment of Critical Limb Ischemia with Resting Pain. *Cardiovasc Intervent Radiol* 2018;41(1):43-48.
13. Sgroi MD, McFarland G, Mell MW. Utilization of regional versus general anesthesia and its impact on lower extremity bypass outcomes. *J Vasc Surg* 2019;69(6):1874-1879.
14. Kontopodis N, Papaioannou A, Tavlas E, *et al.* The use of local anesthesia to perform lower limb revascularization in the fragile patient with critical limb ischemia. *G Chir* 2018;39(2):77-81.
15. Di Minno MN, Milone M, Russolillo A, *et al.* Ropivacaine infusion in diabetics subject with peripheral arterial disease. A prospective study. *Exp Clin Endocrinol Diabetes* 2013;121(2):91-93.
16. Cobb J, Claremont D. Noninvasive measurement techniques for monitoring of microvascular function in the diabetic foot. *Int J Low Extrem Wounds* 2002;1(3):161-169.
17. Chan AW, Tetzlaff JM, Gotzsche PC, *et al.* SPIRIT 2013 explanation and elaboration: guidance for

- 1  
2  
3 protocols of clinical trials. *BMJ* 2013;346:e7586.
- 4  
5 18. Rutherford R B, Baker J D, Ernst C, et al. Recommended standards for reports dealing with lower  
6 extremity ischemia: revised version. *J vasc surg* 1997;26(3):517-538.
- 7  
8 19. Lee JJ, Lee MK, Kim JE, et al. Pain relief scale is more highly correlated with numerical rating  
9 scale than with visual analogue scale in chronic pain patients. *Pain Physician* 2015;18(2):E195–  
10 200.
- 11  
12 20. Beekman E, Verhagen A. Clinimetrics: Hospital Anxiety and Depression Scale. *J physiother* 2018;  
13 64(3):198.
- 14  
15 21. Perrot S, Lantéri-Minet M. Patients' Global Impression of Change in the management of peripheral  
16 neuropathic pain: Clinical relevance and correlations in daily practice. *Eur J Pain* 2019;23(6):1117-  
17 1128.
- 18  
19 22. Craig D, Carli F. Bromage motor blockade score - a score that has lasted more than a lifetime. *Can*  
20 *J Anaesth* 2018;65(7):837-838.
- 21  
22 23. Moher D, Hopewell S, Schulz KF, et al. CONSORT 2010 Explanation and elaboration: updated  
23 guidelines for reporting parallel group randomised trials. *J Clin Epidemiol* 2010;63:e1–37.
- 24  
25 24. McClellan KJ, Faulds D. Ropivacaine: An update of its use in regional anaesthesia. *Drugs*  
26 2000;60:1065–1093.
- 27  
28 25. Yata T, Sano M, Kayama T, et al. Utility of a Finger-Mounted Tissue Oximeter with Near-Infrared  
29 Spectroscopy to Evaluate Limb Ischemia in Patients with Peripheral Arterial Disease. *Ann Vasc Dis*  
30 2019;12(1):36–43.
- 31  
32 26. Laoire ÁN, Murtagh FEM. Systematic review of pharmacological therapies for the management of  
33 ischaemic pain in patients with non-reconstructable critical limb ischaemia. *BMJ Support Palliat*  
34 *Care* 2018;8(4):400–410.
- 35  
36 27. Mifsud M, Cassar K. The Use of Transcutaneous Electrical Stimulation of the Calf in Patients  
37 Undergoing Infrainguinal Bypass Surgery. *Ann Vasc Surg* 2015;29(8):1524–1532.
- 38  
39 28. Persiani F, Paolini A, Camilli D, et al. Peripheral Blood Mononuclear Cells Therapy for Treatment  
40 of Lower Limb Ischemia in Diabetic Patients: A Single-Center Experience. *Ann Vasc Surg*  
41 2018;53:190–196.
- 42  
43 29. Karanth VKL, Karanth TK, Sun Z, et al. Lumbar sympathectomy techniques for critical lower limb  
44 ischaemia due to non-reconstructable peripheral arterial disease. *Cochrane Database Syst*  
45 *Rev* 2016;(12).
- 46  
47 30. King R, Mariano ER, Yajnik M, et al. Outcomes of Ambulatory Upper Extremity Surgery Patients  
48 Discharged Home with Perineural Catheters from a Veterans Health Administration Medical  
49 Center. *Pain Med* 2019;20(11): 2256-2262.
- 50  
51 31. Ilfeld BM, Morey TE, Wang RD, et al. Continuous popliteal sciatic nerve block for postoperative  
52 pain control at home: a randomized, double-blinded, placebo-controlled study. *Anesthesiology*  
53 2002;97(4):959–965.
- 54  
55  
56

## 57 Figure Legends

58  
59 Fig 1. Study process diagram

1  
2  
3  
4 Fig 2. Schedule of the enrollment, interventions and assessments  
5  
6  
7  
8  
9  
10  
11  
12  
13  
14  
15  
16  
17  
18  
19  
20  
21  
22  
23  
24  
25  
26  
27  
28  
29  
30  
31  
32  
33  
34  
35  
36  
37  
38  
39  
40  
41  
42  
43  
44  
45  
46  
47  
48  
49  
50  
51  
52  
53  
54  
55  
56  
57  
58  
59  
60

For peer review only

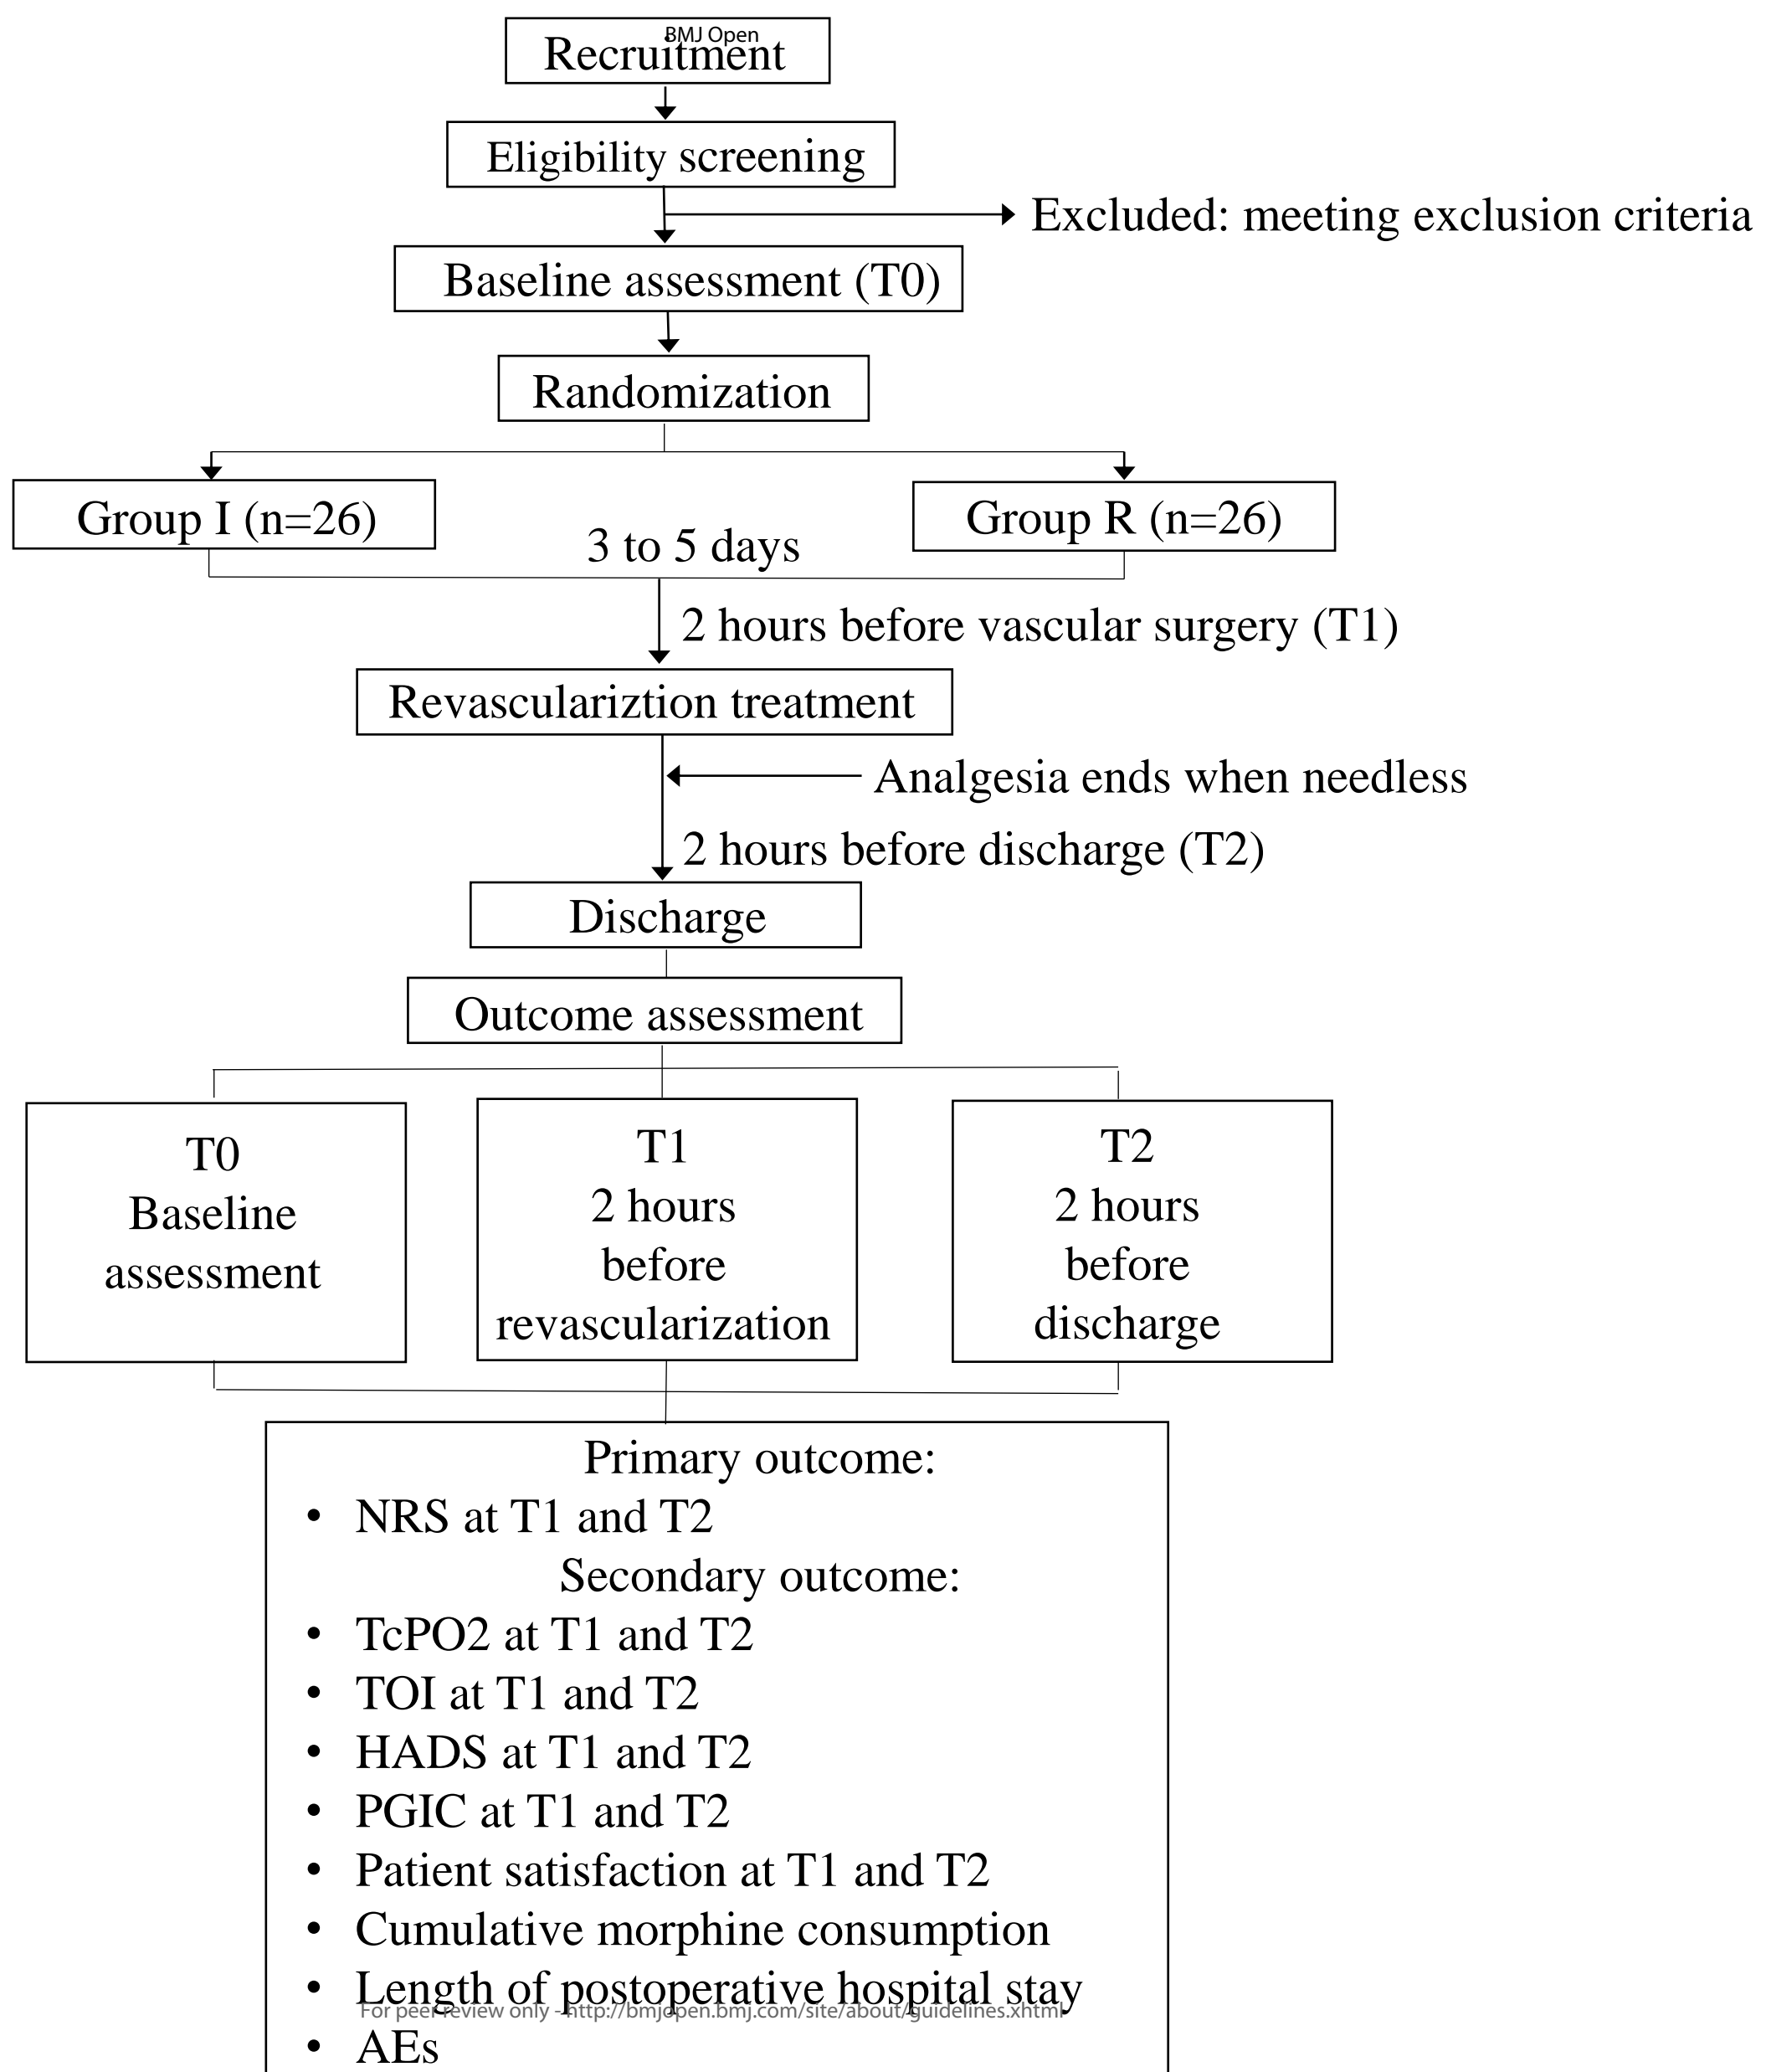

1  
2  
3  
4  
5  
6  
7  
8  
9  
10  
11  
12  
13  
14  
15  
16  
17  
18  
19  
20  
21  
22  
23  
24  
25  
26  
27  
28  
29  
30  
31  
32  
33  
34  
35  
36  
37  
38  
39  
40  
41  
42  
43  
44  
45  
46  
47  
48  
49  
50  
51  
52  
53  
54  
55  
56  
57  
58  
59  
60

|                                              | STUDY PERIOD                                                                                                                               |            |                 |  |           |
|----------------------------------------------|--------------------------------------------------------------------------------------------------------------------------------------------|------------|-----------------|--|-----------|
|                                              | Enrolment                                                                                                                                  | Allocation | Post-allocation |  | Close-out |
| TIMEPOINT                                    |                                                                                                                                            | T0         | T1              |  | T2        |
| <b>ENROLMENT:</b>                            |                                                                                                                                            |            |                 |  |           |
| <i>Eligibility screen</i>                    | x                                                                                                                                          |            |                 |  |           |
| <i>Informed consent</i>                      | x                                                                                                                                          |            |                 |  |           |
| <i>Randomization</i>                         |                                                                                                                                            | x          |                 |  |           |
| <b>INTERVENTIONS:</b>                        |                                                                                                                                            |            |                 |  |           |
| <i>Group I</i>                               |                                                                                                                                            | ←————→     |                 |  |           |
| <i>Group R</i>                               |                                                                                                                                            | ←————→     |                 |  |           |
| <b>ASSESSMENTS:</b>                          |                                                                                                                                            |            |                 |  |           |
| <i>Demographic data</i>                      | x                                                                                                                                          |            |                 |  |           |
| <i>NRS</i>                                   |                                                                                                                                            | x          | x               |  | x         |
| <i>TcPO2</i>                                 |                                                                                                                                            | x          | x               |  | x         |
| <i>TOI</i>                                   |                                                                                                                                            | x          | x               |  | x         |
| <i>HADS</i>                                  |                                                                                                                                            | x          | x               |  | x         |
| <i>PGIC</i>                                  |                                                                                                                                            |            | x               |  | x         |
| <i>Patient satisfaction</i>                  |                                                                                                                                            |            | x               |  | x         |
| <i>Cumulative morphine consumption</i>       |                                                                                                                                            |            |                 |  | x         |
| <i>Length of postoperative hospital stay</i> |                                                                                                                                            |            |                 |  | x         |
| <i>Adverse events</i>                        | For peer review only - <a href="http://bmjopen.bmj.com/site/about/guidelines.xhtml">http://bmjopen.bmj.com/site/about/guidelines.xhtml</a> |            |                 |  | x         |

1  
2  
3  
4  
5  
6  
7  
8  
9  
10  
11  
12  
13  
14  
15  
16  
17  
18  
19  
20  
21  
22  
23  
24  
25  
26  
27  
28  
29  
30  
31  
32  
33  
34  
35  
36  
37  
38  
39  
40  
41

# Reporting checklist for protocol of a clinical trial.

Based on the SPIRIT guidelines.

## Instructions to authors

Complete this checklist by entering the page numbers from your manuscript where readers will find each of the items listed below.

Your article may not currently address all the items on the checklist. Please modify your text to include the missing information. If you are certain that an item does not apply, please write "n/a" and provide a short explanation.

Upload your completed checklist as an extra file when you submit to a journal.

In your methods section, say that you used the SPIRIT reporting guidelines, and cite them as:

Chan A-W, Tetzlaff JM, Altman DG, Laupacis A, Gøtzsche PC, Krleža-Jerić K, Hróbjartsson A, Mann H, Dickersin K, Berlin J, Doré C, Parulekar W, Summerskill W, Groves T, Schulz K, Sox H, Rockhold FW, Rennie D, Moher D. SPIRIT 2013 Statement: Defining standard protocol items for clinical trials. *Ann Intern Med.* 2013;158(3):200-207

|                                             | Reporting Item                                                                                                                  | Page Number |
|---------------------------------------------|---------------------------------------------------------------------------------------------------------------------------------|-------------|
| <b>Administrative information</b>           |                                                                                                                                 |             |
| Title                                       | <a href="#">#1</a> Descriptive title identifying the study design, population, interventions, and, if applicable, trial acronym | 1           |
| Trial registration                          | <a href="#">#2a</a> Trial identifier and registry name. If not yet registered, name of intended registry                        | 3, 8        |
| Trial registration: data set                | <a href="#">#2b</a> All items from the World Health Organization Trial Registration Data Set                                    | 3           |
| Protocol version                            | <a href="#">#3</a> Date and version identifier                                                                                  | 3           |
| Funding                                     | <a href="#">#4</a> Sources and types of financial, material, and other support                                                  | 21          |
| Roles and responsibilities: contributorship | <a href="#">#5a</a> Names, affiliations, and roles of protocol contributors                                                     | 1, 22       |

|    |                           |                     |                                                          |         |
|----|---------------------------|---------------------|----------------------------------------------------------|---------|
| 1  | Roles and                 | <a href="#">#5b</a> | Name and contact information for the trial sponsor       | 21      |
| 2  | responsibilities:         |                     |                                                          |         |
| 3  | sponsor contact           |                     |                                                          |         |
| 4  | information               |                     |                                                          |         |
| 5  |                           |                     |                                                          |         |
| 6  |                           |                     |                                                          |         |
| 7  | Roles and                 | <a href="#">#5c</a> | Role of study sponsor and funders, if any, in study      | 21      |
| 8  | responsibilities:         |                     | design; collection, management, analysis, and            |         |
| 9  | sponsor and funder        |                     | interpretation of data; writing of the report; and the   |         |
| 10 |                           |                     | decision to submit the report for publication, including |         |
| 11 |                           |                     | whether they will have ultimate authority over any of    |         |
| 12 |                           |                     | these activities                                         |         |
| 13 |                           |                     |                                                          |         |
| 14 |                           |                     |                                                          |         |
| 15 |                           |                     |                                                          |         |
| 16 |                           |                     |                                                          |         |
| 17 | Roles and                 | <a href="#">#5d</a> | Composition, roles, and responsibilities of the          | 21      |
| 18 | responsibilities:         |                     | coordinating centre, steering committee, endpoint        |         |
| 19 | committees                |                     | adjudication committee, data management team, and        |         |
| 20 |                           |                     | other individuals or groups overseeing the trial, if     |         |
| 21 |                           |                     | applicable (see Item 21a for data monitoring committee)  |         |
| 22 |                           |                     |                                                          |         |
| 23 |                           |                     |                                                          |         |
| 24 |                           |                     |                                                          |         |
| 25 |                           |                     |                                                          |         |
| 26 | <b>Introduction</b>       |                     |                                                          |         |
| 27 |                           |                     |                                                          |         |
| 28 | Background and            | <a href="#">#6a</a> | Description of research question and justification for   | 5       |
| 29 | rationale                 |                     | undertaking the trial, including summary of relevant     |         |
| 30 |                           |                     | studies (published and unpublished) examining benefits   |         |
| 31 |                           |                     | and harms for each intervention                          |         |
| 32 |                           |                     |                                                          |         |
| 33 |                           |                     |                                                          |         |
| 34 |                           |                     |                                                          |         |
| 35 | Background and            | <a href="#">#6b</a> | Explanation for choice of comparators                    | 5, 6, 7 |
| 36 | rationale: choice of      |                     |                                                          |         |
| 37 | comparators               |                     |                                                          |         |
| 38 |                           |                     |                                                          |         |
| 39 |                           |                     |                                                          |         |
| 40 | Objectives                | <a href="#">#7</a>  | Specific objectives or hypotheses                        | 7       |
| 41 |                           |                     |                                                          |         |
| 42 |                           |                     |                                                          |         |
| 43 | Trial design              | <a href="#">#8</a>  | Description of trial design including type of trial (eg, | 7, 8    |
| 44 |                           |                     | parallel group, crossover, factorial, single group),     |         |
| 45 |                           |                     | allocation ratio, and framework (eg, superiority,        |         |
| 46 |                           |                     | equivalence, non-inferiority, exploratory)               |         |
| 47 |                           |                     |                                                          |         |
| 48 |                           |                     |                                                          |         |
| 49 | <b>Methods:</b>           |                     |                                                          |         |
| 50 | <b>Participants,</b>      |                     |                                                          |         |
| 51 | <b>interventions, and</b> |                     |                                                          |         |
| 52 | <b>outcomes</b>           |                     |                                                          |         |
| 53 |                           |                     |                                                          |         |
| 54 |                           |                     |                                                          |         |
| 55 |                           |                     |                                                          |         |
| 56 | Study setting             | <a href="#">#9</a>  | Description of study settings (eg, community clinic,     | 7, 8    |
| 57 |                           |                     | academic hospital) and list of countries where data will |         |
| 58 |                           |                     |                                                          |         |
| 59 |                           |                     |                                                          |         |
| 60 |                           |                     |                                                          |         |



be collected. Reference to where list of study sites can be obtained

|    |                      |                      |                                                                                                                                                                                                                                                                                                                                                                                |
|----|----------------------|----------------------|--------------------------------------------------------------------------------------------------------------------------------------------------------------------------------------------------------------------------------------------------------------------------------------------------------------------------------------------------------------------------------|
| 1  |                      |                      |                                                                                                                                                                                                                                                                                                                                                                                |
| 2  |                      |                      |                                                                                                                                                                                                                                                                                                                                                                                |
| 3  |                      |                      |                                                                                                                                                                                                                                                                                                                                                                                |
| 4  | Eligibility criteria | <a href="#">#10</a>  | Inclusion and exclusion criteria for participants. If applicable, eligibility criteria for study centres and individuals who will perform the interventions (eg, surgeons, psychotherapists)                                                                                                                                                                                   |
| 5  |                      |                      |                                                                                                                                                                                                                                                                                                                                                                                |
| 6  |                      |                      |                                                                                                                                                                                                                                                                                                                                                                                |
| 7  |                      |                      |                                                                                                                                                                                                                                                                                                                                                                                |
| 8  |                      |                      |                                                                                                                                                                                                                                                                                                                                                                                |
| 9  |                      |                      |                                                                                                                                                                                                                                                                                                                                                                                |
| 10 |                      |                      |                                                                                                                                                                                                                                                                                                                                                                                |
| 11 | Interventions:       | <a href="#">#11a</a> | Interventions for each group with sufficient detail to allow replication, including how and when they will be administered                                                                                                                                                                                                                                                     |
| 12 | description          |                      |                                                                                                                                                                                                                                                                                                                                                                                |
| 13 |                      |                      |                                                                                                                                                                                                                                                                                                                                                                                |
| 14 |                      |                      |                                                                                                                                                                                                                                                                                                                                                                                |
| 15 |                      |                      |                                                                                                                                                                                                                                                                                                                                                                                |
| 16 | Interventions:       | <a href="#">#11b</a> | Criteria for discontinuing or modifying allocated interventions for a given trial participant (eg, drug dose change in response to harms, participant request, or improving / worsening disease)                                                                                                                                                                               |
| 17 | modifications        |                      |                                                                                                                                                                                                                                                                                                                                                                                |
| 18 |                      |                      |                                                                                                                                                                                                                                                                                                                                                                                |
| 19 |                      |                      |                                                                                                                                                                                                                                                                                                                                                                                |
| 20 |                      |                      |                                                                                                                                                                                                                                                                                                                                                                                |
| 21 |                      |                      |                                                                                                                                                                                                                                                                                                                                                                                |
| 22 |                      |                      |                                                                                                                                                                                                                                                                                                                                                                                |
| 23 | Interventions:       | <a href="#">#11c</a> | Strategies to improve adherence to intervention protocols, and any procedures for monitoring adherence (eg, drug tablet return; laboratory tests)                                                                                                                                                                                                                              |
| 24 | adherence            |                      |                                                                                                                                                                                                                                                                                                                                                                                |
| 25 |                      |                      |                                                                                                                                                                                                                                                                                                                                                                                |
| 26 |                      |                      |                                                                                                                                                                                                                                                                                                                                                                                |
| 27 |                      |                      |                                                                                                                                                                                                                                                                                                                                                                                |
| 28 | Interventions:       | <a href="#">#11d</a> | Relevant concomitant care and interventions that are permitted or prohibited during the trial                                                                                                                                                                                                                                                                                  |
| 29 | concomitant care     |                      |                                                                                                                                                                                                                                                                                                                                                                                |
| 30 |                      |                      |                                                                                                                                                                                                                                                                                                                                                                                |
| 31 |                      |                      |                                                                                                                                                                                                                                                                                                                                                                                |
| 32 | Outcomes             | <a href="#">#12</a>  | Primary, secondary, and other outcomes, including the specific measurement variable (eg, systolic blood pressure), analysis metric (eg, change from baseline, final value, time to event), method of aggregation (eg, median, proportion), and time point for each outcome. Explanation of the clinical relevance of chosen efficacy and harm outcomes is strongly recommended |
| 33 |                      |                      |                                                                                                                                                                                                                                                                                                                                                                                |
| 34 |                      |                      |                                                                                                                                                                                                                                                                                                                                                                                |
| 35 |                      |                      |                                                                                                                                                                                                                                                                                                                                                                                |
| 36 |                      |                      |                                                                                                                                                                                                                                                                                                                                                                                |
| 37 |                      |                      |                                                                                                                                                                                                                                                                                                                                                                                |
| 38 |                      |                      |                                                                                                                                                                                                                                                                                                                                                                                |
| 39 |                      |                      |                                                                                                                                                                                                                                                                                                                                                                                |
| 40 |                      |                      |                                                                                                                                                                                                                                                                                                                                                                                |
| 41 |                      |                      |                                                                                                                                                                                                                                                                                                                                                                                |
| 42 |                      |                      |                                                                                                                                                                                                                                                                                                                                                                                |
| 43 | Participant timeline | <a href="#">#13</a>  | Time schedule of enrolment, interventions (including any run-ins and washouts), assessments, and visits for participants. A schematic diagram is highly recommended (see Figure)                                                                                                                                                                                               |
| 44 |                      |                      |                                                                                                                                                                                                                                                                                                                                                                                |
| 45 |                      |                      |                                                                                                                                                                                                                                                                                                                                                                                |
| 46 |                      |                      |                                                                                                                                                                                                                                                                                                                                                                                |
| 47 |                      |                      |                                                                                                                                                                                                                                                                                                                                                                                |
| 48 |                      |                      |                                                                                                                                                                                                                                                                                                                                                                                |
| 49 |                      |                      |                                                                                                                                                                                                                                                                                                                                                                                |
| 50 | Sample size          | <a href="#">#14</a>  | Estimated number of participants needed to achieve study objectives and how it was determined, including clinical and statistical assumptions supporting any sample size calculations                                                                                                                                                                                          |
| 51 |                      |                      |                                                                                                                                                                                                                                                                                                                                                                                |
| 52 |                      |                      |                                                                                                                                                                                                                                                                                                                                                                                |
| 53 |                      |                      |                                                                                                                                                                                                                                                                                                                                                                                |
| 54 |                      |                      |                                                                                                                                                                                                                                                                                                                                                                                |
| 55 |                      |                      |                                                                                                                                                                                                                                                                                                                                                                                |
| 56 |                      |                      |                                                                                                                                                                                                                                                                                                                                                                                |
| 57 | Recruitment          | <a href="#">#15</a>  | Strategies for achieving adequate participant enrolment to reach target sample size                                                                                                                                                                                                                                                                                            |
| 58 |                      |                      |                                                                                                                                                                                                                                                                                                                                                                                |
| 59 |                      |                      |                                                                                                                                                                                                                                                                                                                                                                                |
| 60 |                      |                      |                                                                                                                                                                                                                                                                                                                                                                                |

1 **Methods:**

2 **Assignment of**  
3 **interventions (for**  
4 **controlled trials)**  
5  
6

|    |                      |                      |                                                           |
|----|----------------------|----------------------|-----------------------------------------------------------|
| 7  |                      |                      |                                                           |
| 8  | Allocation: sequence | <a href="#">#16a</a> | Method of generating the allocation sequence (eg,         |
| 9  | generation           |                      | computer-generated random numbers), and list of any       |
| 10 |                      |                      | factors for stratification. To reduce predictability of a |
| 11 |                      |                      | random sequence, details of any planned restriction (eg,  |
| 12 |                      |                      | blocking) should be provided in a separate document       |
| 13 |                      |                      | that is unavailable to those who enrol participants or    |
| 14 |                      |                      | assign interventions                                      |
| 15 |                      |                      |                                                           |
| 16 |                      |                      |                                                           |
| 17 |                      |                      |                                                           |
| 18 |                      |                      |                                                           |
| 19 | Allocation           | <a href="#">#16b</a> | Mechanism of implementing the allocation sequence         |
| 20 | concealment          |                      | (eg, central telephone; sequentially numbered, opaque,    |
| 21 | mechanism            |                      | sealed envelopes), describing any steps to conceal the    |
| 22 |                      |                      | sequence until interventions are assigned                 |
| 23 |                      |                      |                                                           |
| 24 |                      |                      |                                                           |
| 25 |                      |                      |                                                           |
| 26 | Allocation:          | <a href="#">#16c</a> | Who will generate the allocation sequence, who will       |
| 27 | implementation       |                      | enrol participants, and who will assign participants to   |
| 28 |                      |                      | interventions                                             |
| 29 |                      |                      |                                                           |
| 30 |                      |                      |                                                           |
| 31 | Blinding (masking)   | <a href="#">#17a</a> | Who will be blinded after assignment to interventions     |
| 32 |                      |                      | (eg, trial participants, care providers, outcome          |
| 33 |                      |                      | assessors, data analysts), and how                        |
| 34 |                      |                      |                                                           |
| 35 |                      |                      |                                                           |
| 36 | Blinding (masking):  | <a href="#">#17b</a> | If blinded, circumstances under which unblinding is       |
| 37 | emergency unblinding |                      | permissible, and procedure for revealing a participant's  |
| 38 |                      |                      | allocated intervention during the trial                   |
| 39 |                      |                      |                                                           |
| 40 |                      |                      |                                                           |

41 **Methods: Data**  
42 **collection,**  
43 **management, and**  
44 **analysis**  
45  
46  
47

|    |                      |                      |                                                             |
|----|----------------------|----------------------|-------------------------------------------------------------|
| 48 |                      |                      |                                                             |
| 49 | Data collection plan | <a href="#">#18a</a> | Plans for assessment and collection of outcome,             |
| 50 |                      |                      | baseline, and other trial data, including any related       |
| 51 |                      |                      | processes to promote data quality (eg, duplicate            |
| 52 |                      |                      | measurements, training of assessors) and a description      |
| 53 |                      |                      | of study instruments (eg, questionnaires, laboratory        |
| 54 |                      |                      | tests) along with their reliability and validity, if known. |
| 55 |                      |                      | Reference to where data collection forms can be found,      |
| 56 |                      |                      |                                                             |
| 57 |                      |                      |                                                             |
| 58 |                      |                      |                                                             |
| 59 |                      |                      |                                                             |
| 60 |                      |                      |                                                             |

if not in the protocol

|    |                            |                      |                                                              |
|----|----------------------------|----------------------|--------------------------------------------------------------|
| 1  |                            |                      |                                                              |
| 2  |                            |                      |                                                              |
| 3  | Data collection plan:      | <a href="#">#18b</a> | Plans to promote participant retention and complete          |
| 4  | retention                  |                      | follow-up, including list of any outcome data to be          |
| 5  |                            |                      | collected for participants who discontinue or deviate        |
| 6  |                            |                      | from intervention protocols                                  |
| 7  |                            |                      |                                                              |
| 8  |                            |                      |                                                              |
| 9  | Data management            | <a href="#">#19</a>  | Plans for data entry, coding, security, and storage,         |
| 10 |                            |                      | including any related processes to promote data quality      |
| 11 |                            |                      | (eg, double data entry; range checks for data values).       |
| 12 |                            |                      | Reference to where details of data management                |
| 13 |                            |                      | procedures can be found, if not in the protocol              |
| 14 |                            |                      |                                                              |
| 15 |                            |                      |                                                              |
| 16 |                            |                      |                                                              |
| 17 | Statistics: outcomes       | <a href="#">#20a</a> | Statistical methods for analysing primary and secondary      |
| 18 |                            |                      | outcomes. Reference to where other details of the            |
| 19 |                            |                      | statistical analysis plan can be found, if not in the        |
| 20 |                            |                      | protocol                                                     |
| 21 |                            |                      |                                                              |
| 22 |                            |                      |                                                              |
| 23 |                            |                      |                                                              |
| 24 | Statistics: additional     | <a href="#">#20b</a> | Methods for any additional analyses (eg, subgroup and        |
| 25 | analyses                   |                      | adjusted analyses)                                           |
| 26 |                            |                      |                                                              |
| 27 |                            |                      |                                                              |
| 28 | Statistics: analysis       | <a href="#">#20c</a> | Definition of analysis population relating to protocol non-  |
| 29 | population and             |                      | adherence (eg, as randomised analysis), and any              |
| 30 | missing data               |                      | statistical methods to handle missing data (eg, multiple     |
| 31 |                            |                      | imputation)                                                  |
| 32 |                            |                      |                                                              |
| 33 |                            |                      |                                                              |
| 34 |                            |                      |                                                              |
| 35 | <b>Methods: Monitoring</b> |                      |                                                              |
| 36 |                            |                      |                                                              |
| 37 | Data monitoring:           | <a href="#">#21a</a> | Composition of data monitoring committee (DMC);              |
| 38 | formal committee           |                      | summary of its role and reporting structure; statement of    |
| 39 |                            |                      | whether it is independent from the sponsor and               |
| 40 |                            |                      | competing interests; and reference to where further          |
| 41 |                            |                      | details about its charter can be found, if not in the        |
| 42 |                            |                      | protocol. Alternatively, an explanation of why a DMC is      |
| 43 |                            |                      | not needed                                                   |
| 44 |                            |                      |                                                              |
| 45 |                            |                      |                                                              |
| 46 |                            |                      |                                                              |
| 47 |                            |                      |                                                              |
| 48 | Data monitoring:           | <a href="#">#21b</a> | Description of any interim analyses and stopping             |
| 49 | interim analysis           |                      | guidelines, including who will have access to these          |
| 50 |                            |                      | interim results and make the final decision to terminate     |
| 51 |                            |                      | the trial                                                    |
| 52 |                            |                      |                                                              |
| 53 |                            |                      |                                                              |
| 54 |                            |                      |                                                              |
| 55 | Harms                      | <a href="#">#22</a>  | Plans for collecting, assessing, reporting, and managing     |
| 56 |                            |                      | solicited and spontaneously reported adverse events          |
| 57 |                            |                      | and other unintended effects of trial interventions or trial |
| 58 |                            |                      |                                                              |
| 59 |                            |                      |                                                              |
| 60 |                            |                      |                                                              |

|    |                          |                                                                                |          |
|----|--------------------------|--------------------------------------------------------------------------------|----------|
|    |                          | conduct                                                                        |          |
| 1  |                          |                                                                                |          |
| 2  | Auditing                 | <a href="#">#23</a> Frequency and procedures for auditing trial conduct, if    | 16       |
| 3  |                          | any, and whether the process will be independent from                          |          |
| 4  |                          | investigators and the sponsor                                                  |          |
| 5  |                          |                                                                                |          |
| 6  |                          |                                                                                |          |
| 7  |                          |                                                                                |          |
| 8  | <b>Ethics and</b>        |                                                                                |          |
| 9  | <b>dissemination</b>     |                                                                                |          |
| 10 |                          |                                                                                |          |
| 11 | Research ethics          | <a href="#">#24</a> Plans for seeking research ethics committee /              | 17       |
| 12 | approval                 | institutional review board (REC / IRB) approval                                |          |
| 13 |                          |                                                                                |          |
| 14 |                          |                                                                                |          |
| 15 | Protocol amendments      | <a href="#">#25</a> Plans for communicating important protocol                 | 17       |
| 16 |                          | modifications (eg, changes to eligibility criteria,                            |          |
| 17 |                          | outcomes, analyses) to relevant parties (eg,                                   |          |
| 18 |                          | investigators, REC / IRBs, trial participants, trial                           |          |
| 19 |                          | registries, journals, regulators)                                              |          |
| 20 |                          |                                                                                |          |
| 21 |                          |                                                                                |          |
| 22 |                          |                                                                                |          |
| 23 |                          |                                                                                |          |
| 24 | Consent or assent        | <a href="#">#26a</a> Who will obtain informed consent or assent from           | 8, 9, 17 |
| 25 |                          | potential trial participants or authorised surrogates, and                     |          |
| 26 |                          | how (see Item 32)                                                              |          |
| 27 |                          |                                                                                |          |
| 28 |                          |                                                                                |          |
| 29 | Consent or assent:       | <a href="#">#26b</a> Additional consent provisions for collection and use of   | N/A      |
| 30 | ancillary studies        | participant data and biological specimens in ancillary                         |          |
| 31 |                          | studies, if applicable                                                         |          |
| 32 |                          |                                                                                |          |
| 33 |                          |                                                                                |          |
| 34 | Confidentiality          | <a href="#">#27</a> How personal information about potential and enrolled      | 15, 16   |
| 35 |                          | participants will be collected, shared, and maintained in                      |          |
| 36 |                          | order to protect confidentiality before, during, and after                     |          |
| 37 |                          | the trial                                                                      |          |
| 38 |                          |                                                                                |          |
| 39 |                          |                                                                                |          |
| 40 |                          |                                                                                |          |
| 41 | Declaration of           | <a href="#">#28</a> Financial and other competing interests for principal      | 22       |
| 42 | interests                | investigators for the overall trial and each study site                        |          |
| 43 |                          |                                                                                |          |
| 44 |                          |                                                                                |          |
| 45 | Data access              | <a href="#">#29</a> Statement of who will have access to the final trial       | 16       |
| 46 |                          | dataset, and disclosure of contractual agreements that                         |          |
| 47 |                          | limit such access for investigators                                            |          |
| 48 |                          |                                                                                |          |
| 49 |                          |                                                                                |          |
| 50 | Ancillary and post trial | <a href="#">#30</a> Provisions, if any, for ancillary and post-trial care, and | 12       |
| 51 | care                     | for compensation to those who suffer harm from trial                           |          |
| 52 |                          | participation                                                                  |          |
| 53 |                          |                                                                                |          |
| 54 |                          |                                                                                |          |
| 55 |                          |                                                                                |          |
| 56 | Dissemination policy:    | <a href="#">#31a</a> Plans for investigators and sponsor to communicate trial  | 19       |
| 57 | trial results            | results to participants, healthcare professionals, the                         |          |
| 58 |                          | public, and other relevant groups (eg, via publication,                        |          |
| 59 |                          |                                                                                |          |
| 60 |                          |                                                                                |          |

reporting in results databases, or other data sharing arrangements), including any publication restrictions

|                                             |                      |                                                                                                                 |    |
|---------------------------------------------|----------------------|-----------------------------------------------------------------------------------------------------------------|----|
| Dissemination policy: authorship            | <a href="#">#31b</a> | Authorship eligibility guidelines and any intended use of professional writers                                  | 19 |
| Dissemination policy: reproducible research | <a href="#">#31c</a> | Plans, if any, for granting public access to the full protocol, participant-level dataset, and statistical code | 15 |

## Appendices

|                            |                     |                                                                                                                                                                                                |                |
|----------------------------|---------------------|------------------------------------------------------------------------------------------------------------------------------------------------------------------------------------------------|----------------|
| Informed consent materials | <a href="#">#32</a> | Model consent form and other related documentation given to participants and authorised surrogates                                                                                             | 17, Appendix 2 |
| Biological specimens       | <a href="#">#33</a> | Plans for collection, laboratory evaluation, and storage of biological specimens for genetic or molecular analysis in the current trial and for future use in ancillary studies, if applicable | N/A            |

The SPIRIT checklist is distributed under the terms of the Creative Commons Attribution License CC-BY-ND 3.0. This checklist was completed on 19. February 2020 using <https://www.goodreports.org/>, a tool made by the [EQUATOR Network](#) in collaboration with [Penelope.ai](#)

## 受试者知情同意书

**研究项目名称：**不同镇痛方式用于重症下肢缺血患者的围术期作用效果研究

**研究负责人：**陈思

**联系电话：**13466364034

**研究单位：**中国医学科学院北京协和医院

1. **研究背景、目的：**重症下肢缺血以静息痛、溃疡、坏疽为主要特征。疼痛刺激不仅降低患者的生活质量，还可诱发心脑血管事件、进一步加重神经病理性改变。良好的疼痛管理可帮助患者减轻临床症状、延缓病情发展、改善生活质量、延长生存周期。本研究目的在于比较病人自控周围神经连续阻滞技术(方法 1)与病人自控静脉镇痛技术(方法 2)在患者围术期的镇痛效果以及其对下肢血流灌注的改善作用。其中，方法 1 属疼痛介入治疗，通过坐骨神经周围置管完成，优势在于能够扩张下肢血管、减少患者阿片类药物使用量、镇痛效果明确；不足在于属有创操作，导管置于体内，有渗漏、移位、感染等风险。方法 2 通过静脉持续使用阿片类药物完成，优势在于镇痛效果明确，不足在于有嗜睡、头晕、恶心、呕吐、瘙痒、阿片类药物过量、耐受等风险。本研究于 2017 年 3 月 21 日通过北京协和医院伦理委员会审查（编号 ZS-1289X）。
2. **受试者纳入标准：**
  - a) 18~80 岁；
  - b) 诊断为重症下肢缺血，入院行血管开通治疗；
  - c) 单侧为主，疼痛部位主要在坐骨神经支配区域；
  - d) Rutherford 症状分级 6 级；
  - e) ASA（美国麻醉医师协会）分级 II~III 级。**受试者排除标准：**
  - a) 入院前使用阿片类药物止痛；
  - b) 对研究中可能使用的药物有明确的过敏史；
  - c) 严重肝肾功能不全；
  - d) 神经周围置管禁忌（如穿刺部位感染、凝血功能异常、无法配合体位或拒绝穿刺）；
  - e) 患侧足背皮肤不完整；
  - f) 无法理解调查量表或无法表述自己的感受。
3. **研究内容、方法及程序：**入院后将随机为患者选取一种镇痛方式，在镇痛前后分别进行以下内容：
  - a) **常规疼痛诊疗：**治疗疼痛、协助医生评估镇痛效果；
  - b) **研究所附加的诊疗项目：**填写调查问卷、测量皮肤温度及患肢血流速度（无创伤）。
4. **参加研究的可能风险（或不适、不便）和收益（个人或社会群体受益）：**
  - a) **可能风险（或不适、不便）：**携带病人自控镇痛装置可能存在轻微不便，
  - b) **收益：**获得更为确切、舒适的疼痛诊疗体验和更密切的镇痛随访，对于未来此类患者的治疗选择将更加有益。
5. **有关内容的咨询：**您有权就有关研究内容进行咨询，咨询电话（主要研究者）：010-69152020 或 13466364034，电子邮箱：yuehongzheng@yahoo.com；您有权就有关您的权利或相关风险等问题进行咨询，咨询电话（伦理审查委员会电话）：010-69154494，电子邮箱：pumchkyc@126.com。
6. **退出研究的权利：**您参加此项研究是完全自愿的。无需任何原因，您不愿意参加或不愿

1  
2  
3 继续参加此研究，并不会对您的权益有任何影响。此外，您有权在任何时间退出此研  
4 究。（如果您没有按医生指示，或医生为您的健康和益处着想，医生或研究者也可能要  
5 求您退出。）  
6

- 7 7. 研究的费用及赔偿问题：常规疼痛诊疗产生的费用由您及患者自行缴纳的医疗保险承担  
8 及赔付；研究所附加的诊疗项目产生的费用由课题组经费承担，如果您由于参加此研  
9 究所附加的项目而使健康受到损害，将由北京协和医院麻醉科及血管外科负责提供补  
10 偿费用。  
11  
12 8. 保密制度：您参加此研究所获得的医疗信息将得到保密。研究结果在学术刊物上发表时  
13 也不会泄露任何可识别您个人身份的信息。北京协和医院将保存您在这项研究中的全  
14 部记录以及有关的医院和办公室记录，未经授权任何人不得获取这些信息。  
15  
16 9. 本知情同意书一式两份，受试者和研究者各一份，双方签字后有效。  
17  
18

19 **受试者的知情同意：**

20 我已详细阅读并充分了解以上内容，并对以上内容，特别是我参与此研究的权利、风险  
21 和受益进行了认真考虑。我自愿参加这项研究，愿意与研究人员合作。同时声明我可以任  
22 何时候因任何原因退出此研究，而不会丧失任何合法权利。  
23  
24  
25

26 受试者姓名：\_\_\_\_\_ 受试者签字：\_\_\_\_\_ 日期：\_\_\_\_\_ 年 \_\_\_\_\_ 月 \_\_\_\_\_ 日  
27  
28

29 研究者姓名：\_\_\_\_\_ 研究者签字：\_\_\_\_\_ 日期：\_\_\_\_\_ 年 \_\_\_\_\_ 月 \_\_\_\_\_ 日  
30  
31  
32  
33  
34  
35  
36  
37  
38  
39  
40  
41  
42  
43  
44  
45  
46  
47  
48  
49  
50  
51  
52  
53  
54  
55  
56  
57  
58  
59  
60
