# Supplementary material for: Perioperative patient-controlled regional analgesia versus patient-controlled intravenous analgesia for patients with critical limb ischaemia: a study protocol for a randomised controlled trial
Source: PubMed Central journal article supplement — BMJ Open. 2020 Oct 8;10(10):e037879. doi: 10.1136/bmjopen-2020-037879 (PMC7545635; doi:10.1136/bmjopen-2020-037879), 2020-10-08
Supplement: bmjopen-2020-037879supp002.pdf [file bmjopen-2020-037879supp002.pdf]

## 受试者知情同意书

**研究项目名称：**不同镇痛方式用于重症下肢缺血患者的围术期作用效果研究

**研究负责人：**陈思

**联系电话：**13466364034

**研究单位：**中国医学科学院北京协和医院

1. 研究背景、目的：重症下肢缺血以静息痛、溃疡、坏疽为主要特征。疼痛刺激不仅降低患者的生活质量，还可诱发心脑血管事件、进一步加重神经病理性改变。良好的疼痛管理可帮助患者减轻临床症状、延缓病情发展、改善生活质量、延长生存周期。本研究目的在于比较病人自控周围神经连续阻滞技术(方法1)与病人自控静脉镇痛技术(方法2)在患者围术期的镇痛效果以及其对下肢血流灌注的改善作用。其中，方法1属疼痛介入治疗，通过坐骨神经周围置管完成，优势在于能够扩张下肢血管、减少患者阿片类药物使用量、镇痛效果明确；不足在于属有创操作，导管置于体内，有渗漏、移位、感染等风险。方法2通过静脉持续使用阿片类药物完成，优势在于镇痛效果明确，不足在于有嗜睡、头晕、恶心、呕吐、瘙痒、阿片类药物过量、耐受等风险。本研究于2017年3月21日通过北京协和医院伦理委员会审查（编号ZS-1289X）。
2. 受试者纳入标准：
  - a) 18~80岁；
  - b) 诊断为重症下肢缺血，入院行血管开通治疗；
  - c) 单侧为主，疼痛部位主要在坐骨神经支配区域；
  - d) Rutherford症状分级6级；
  - e) ASA（美国麻醉医师协会）分级II~III级。受试者排除标准：
  - a) 入院前使用阿片类药物止痛；
  - b) 对研究中可能使用的药物有明确的过敏史；
  - c) 严重肝肾功能不全；
  - d) 神经周围置管禁忌（如穿刺部位感染、凝血功能异常、无法配合体位或拒绝穿刺）；
  - e) 患侧足背皮肤不完整；
  - f) 无法理解调查量表或无法表述自己的感受。
3. 研究内容、方法及程序：入院后将随机为患者选取一种镇痛方式，在镇痛前后分别进行以下内容：
  - a) 常规疼痛诊疗：治疗疼痛、协助医生评估镇痛效果；
  - b) 研究所附加的诊疗项目：填写调查问卷、测量皮肤温度及患肢血流速度（无创伤）。
4. 参加研究的可能风险（或不适、不便）和收益（个人或社会群体受益）：
  - a) 可能风险（或不适、不便）：携带病人自控镇痛装置可能存在轻微不便，
  - b) 收益：获得更为确切、舒适的疼痛诊疗体验和更密切的镇痛随访，对于未来此类患者的治疗选择将更加有益。
5. 有关内容的咨询：您有权就有关研究内容进行咨询，咨询电话（主要研究者）：010-69152020 或 13466364034，电子邮箱：yuehongzheng@yahoo.com；您有权就有关您的权利或相关风险等问题进行咨询，咨询电话（伦理审查委员会电话）：010-69154494，电子邮箱：pumchkyc@126.com。
6. 退出研究的权利：您参加此项研究是完全自愿的。无需任何原因，您不愿意参加或不愿

继续参加此研究，并不会对您的权益有任何影响。此外，您有权在任何时间退出此研究。（如果您没有按医生指示，或医生为您的健康和益处着想，医生或研究者也可能要求您退出。）

7. 研究的费用及赔偿问题：常规疼痛诊疗产生的费用由您及患者自行缴纳的医疗保险承担及赔付；研究所附加的诊疗项目产生的费用由课题组经费承担，如果您由于参加此研究所附加的项目而使健康受到损害，将由北京协和医院麻醉科及血管外科负责提供补偿费用。
8. 保密制度：您参加此研究所获得的医疗信息将得到保密。研究结果在学术刊物上发表时也不会泄露任何可识别您个人身份的信息。北京协和医院将保存您在这项研究中的全部记录以及有关的医院和办公室记录，未经授权任何人不得获取这些信息。
9. 本知情同意书一式两份，受试者和研究者各一份，双方签字后有效。

**受试者的知情同意：**

我已详细阅读并充分了解以上内容，并对以上内容，特别是我参与此研究的权利、风险和受益进行了认真考虑。我自愿参加这项研究，愿意与研究人员合作。同时声明我可以在任何时候因任何原因退出此研究，而不会丧失任何合法权利。

受试者姓名：\_\_\_\_\_受试者签字：\_\_\_\_\_日期：\_\_\_\_\_年\_\_\_\_\_月\_\_\_\_\_日

研究者姓名：\_\_\_\_\_研究者签字：\_\_\_\_\_日期：\_\_\_\_\_年\_\_\_\_\_月\_\_\_\_\_日
